1                   **Osteo-Oto-Hepato-Enteric Syndrome (O2HE)**  
2                   **is caused by loss of function mutations in *UNC45A***

3  
4                   **Authors and Affiliations**

5  
6                   **Clothilde Esteve,<sup>1, 20</sup> Ludmila Francescato,<sup>2, 20</sup> Perciliz L. Tan,<sup>2, 3, 20</sup> Aurélie**  
7                   **Bourchany,<sup>4, 5, 21</sup> Cécile De Leusse,<sup>6, 21</sup> Evelyne Marinier,<sup>7, 21</sup> Arnaud**  
8                   **Blanchard,<sup>1</sup> Patrice Bourgeois,<sup>1,9</sup> Céline Brochier-Armanet,<sup>10</sup> Ange-Line Bruel,<sup>4</sup>**  
9                   **Arnaud Delarue,<sup>6</sup> Yannis Duffourd,<sup>4,8</sup> Emmanuelle Ecochard-Dugelay,<sup>7</sup>**  
10                   **Géraldine Hery,<sup>6</sup> Frédéric Huet,<sup>5</sup> Philippe Gauchez,<sup>6</sup> Emmanuel Gonzales,<sup>11, 12</sup>**  
11                   **Catherine Guettier-Bouttier,<sup>13</sup> Mina Komuta,<sup>14</sup> Caroline Lacoste,<sup>9</sup> Raphaëlle**  
12                   **Maudinas,<sup>5</sup> Karin Mazodier,<sup>15</sup> Yves Rimet,<sup>16</sup> Jean-Baptiste Rivière,<sup>4</sup> Bertrand**  
13                   **Roquelaure,<sup>6</sup> Sabine Sigaudy,<sup>17</sup> Xavier Stephenne,<sup>18</sup> Christel Thauvin-**  
14                   **Robinet,<sup>4,8</sup> Julien Thevenon,<sup>4</sup> Jacques Sarles,<sup>6</sup> Nicolas Levy,<sup>1,9</sup> Catherine**  
15                   **Badens,<sup>1,9</sup> Olivier Goulet,<sup>19</sup> Jean-Pierre Hugot,<sup>7</sup> Nicholas Katsanis,<sup>2, 3, 22</sup>**  
16                   **Laurence Faivre,<sup>4, 8, 22</sup> Alexandre Fabre,<sup>1, 6, 22 \*</sup>**

17  
18                   <sup>1</sup> Aix Marseille Univ, INSERM, GMGF, Marseille, France

19                   <sup>2</sup> Center for Human Disease Modeling, Duke University, Durham, North Carolina,  
20                   USA

21                   <sup>3</sup> Department of Cell Biology, Duke University Medical Center, Durham, North  
22                   Carolina, United States

23 <sup>4</sup> Equipe GAD, UMR1231 Inserm, Université de Bourgogne Franche Comté, Dijon,  
24 France

25 <sup>5</sup> Service de Pédiatrie, Hôpital D'Enfants, CHU, Dijon, France

26 <sup>6</sup> Service de pédiatrie multidisciplinaire, Hôpital de la Timone Enfants, APHM,  
27 Marseille, France

28 <sup>7</sup> Service des maladies digestives et respiratoires de l'enfant, Hôpital Robert Debré,  
29 APHP, Paris, France

30 <sup>8</sup> Centre de Référence Anomalies du Développement et Syndromes Malformatifs et  
31 FHU TRANSLAD, CHU Dijon, France

32 <sup>9</sup> Service de biologie moléculaire, Hôpital de la Timone Enfants, APHM, Marseille,  
33 France

34 <sup>10</sup> Univ Lyon, Université Claude Bernard Lyon 1, CNRS, Laboratoire de Biométrie et  
35 Biologie Évolutive (UMR CNRS / Lyon 1 5558), F-69622, Villeurbanne, France.

36 <sup>11</sup> Pediatric hepatology and pediatric liver transplantation unit and National Reference  
37 Centre for rare pediatric liver diseases, Hepatinov, Bicêtre University Hospital,  
38 University of Paris-Sud, Assistance Publique-Hôpitaux de Paris, Le Kremlin Bicêtre,  
39 France

40 <sup>12</sup> Inserm, UMR-S1174, Hepatinov, University of Paris-Sud 11, Orsay

41 <sup>13</sup> Pathology Unit, Bicêtre University Hospital, University of Paris-Sud, Assistance  
42 Publique-Hôpitaux de Paris, Le Kremlin Bicêtre

43 <sup>14</sup> Anatomopathology Department, Cliniques Universitaires Saint-Luc, Brussels,  
44 Belgium

45 <sup>15</sup> Internal medicine and clinical, Hôpital Conception, APHM, Marseille, France

46 <sup>16</sup> Service de Pédiatrie-Néonatalogie, Centre Hospitalier Intercommunal Aix-Pertuis,  
47 France

48 <sup>17</sup> Département de Génétique Médicale, Hôpital de la Timone Enfants de La Timone,  
49 APHM, Marseille, France

50 <sup>18</sup> Université catholique de Louvain, Cliniques universitaires St Luc, Département de  
51 pédiatrie, Service de gastroentérologie et hépatologie pédiatrique, Bruxelles,  
52 Belgique

53 <sup>19</sup> Department of Pediatric Gastroenterology, Hepatology and Nutrition, Reference  
54 center for Rare Digestive Diseases; Hôpital Necker; University Paris-Cité-Sorbonne;  
55 Paris-Descartes Medical School

56 <sup>20</sup> These authors contributed equally to this work

57 <sup>21</sup> These authors contributed equally to this work

58 <sup>22</sup> These authors contributed equally to this work

59 \* Corresponding author: alexandre.fabre@univ-amu.fr

60

61 **Abstract**

62 Despite the rapid discovery of genes for rare genetic disorders, we continue to  
63 encounter individuals presenting with hitherto unknown syndromic manifestations.  
64 Here, we have studied four affected people in three families presenting with  
65 cholestasis, congenital diarrhea, impaired hearing and bone fragility, a clinical entity

66 we have termed O2HE (Osteo-Oto-Hepato-enteric) syndrome. Whole exome  
67 sequencing of all affected individuals and their parents identified biallelic mutations in  
68 Unc-45 Myosin Chaperone A (UNC45A), as a likely driver for this disorder.  
69 Subsequent in vitro and in vivo functional studies of the candidate gene indicated a  
70 loss of function paradigm, wherein mutations attenuated or abolished protein activity  
71 with concomitant defects in gut development and function.

## 72 **Introduction**

73 The association of congenital diarrhea and hereditary cholestasis in childhood and  
74 infancy is rare, and many patients remain genetically undiagnosed. Recently, some  
75 genes identified in one clinical presentation have been expanded to other clinical  
76 features. As an example, compound heterozygous and homozygous variants in  
77 myosin VB (*MYO5B*) have been identified as a cause of congenital diarrhea with  
78 microvillus inclusion disease (MVID; MIM251850) <sup>1</sup>. Cholestasis, reported as an  
79 atypical presentation in MVID, has been considered a side effect of parenteral  
80 alimentation. Next generation sequencing approaches have been necessary to span  
81 the clinical spectrum to isolated cholestasis<sup>2; 3</sup>. It has been shown that *MYO5B*,  
82 associated with plasma membrane recycling and transcytosis, is essential for  
83 polarization of hepatocytes, enterocytes, and respiratory epithelial cells<sup>4; 5</sup>. This  
84 broadening of clinical spectra has been important for the demonstration that microvilli  
85 are markers of disorders in apical-membrane trafficking and assembly, from bowel to  
86 liver <sup>6; 7</sup>. Such variable clinical presentations have also been demonstrated, for other  
87 genes responsible for digestive and liver diseases, including *ABCB11* <sup>8; 9</sup>, *TTC37* and  
88 *SKIV2L* <sup>10-12</sup>. Here, we investigated four families presenting with a phenotypic  
89 constellation that includes cholestasis, congenital diarrhea, impaired hearing and  
90 bone fragility. We were intrigued by the fact that, although several of the presenting

91 features are also encountered in various genetic syndromes, we could not identify  
92 examples in the literature in which patients shared all observed pathologies. Given  
93 these observations, we hypothesized that the constellation of phenotypes in the  
94 individuals in our study likely represent a hitherto unknown clinical entity, which we  
95 have named tentatively O2HE (Osteo-Oto-Hepato-enteric) syndrome. To understand  
96 the genetic basis of this disorder and to provide an entry point towards both  
97 mechanisms and potential therapeutic targets, we studied four patients from three  
98 families. By combining sequencing with functional studies of candidate genes *in vitro*  
99 and *in vivo*, we identified Unc-45 Myosin Chaperone A (*UNC45A*), as a driver for this  
100 disorder. *UNC45A* belongs to the UCS protein family (*UNC-45/CRO1/She4p*) and  
101 has not been linked previously to human genetic disorders. Notably, the *C. elegans*  
102 *UNC-45* ortholog was first described in a screen for mutations causing motility  
103 disorders, a finding likely relevant to the etiopathology seen in humans.

## 104 **Material & Methods**

### 105 **Whole Exome Sequencing (WES)**

106 We obtained written consent from parents under a protocol approved by each of our  
107 perspective institutional review boards. Genomic DNA was extracted from peripheral-  
108 blood samples from the proband and both parents via standard procedures using the  
109 Gentra Puregene blood kit (Qiagen). Family A samples were processed in Dijon  
110 University Hospital. The Biobank of the Department of Genetics of La Timone  
111 Hospital proceeded with the DNA extraction and ensured the long-term storage of  
112 samples from families B and C.

113 For all patients (A.II.2, B.II.3, B.II.4, C.II.1 and their parents') whole-exome  
114 capture and sequencing were performed at Integragen platform (Integragen SA,

115 Evry, France) from 1.5 µg of genomic DNA per individual using SureSelect Human  
116 All Exon V5 kit (Agilent). The resulting libraries were sequenced on a HiSeq 2000  
117 (Illumina) according to the manufacturer's recommendations for paired-end 75 bp  
118 reads. Reads were aligned to the human genome reference sequence  
119 (GRCh37/hg19 build of UCSC Genome Browser) with the Burrows-Wheeler Aligner  
120 (BWA, v.0.7.6a), and potential duplicate paired-end reads were marked with Picard  
121 v.1.109. The Genome Analysis Toolkit (GATK) v.3.3-0 was used for base quality  
122 score recalibration, indel realignment, and variant discovery (both single-nucleotide  
123 variants and indels). Read mapping and variant calling were used for data analysis  
124 and interpretation. Variants were annotated with SeattleSeq SNP Annotation 138.  
125 Variants present at a frequency > 1% in dbSNP 138 and the NHLBI GO Exome  
126 Sequencing Project or present from local exomes of unaffected individuals were  
127 excluded (see URLs). For the patient A, variants were filtered as described<sup>13</sup>. For  
128 patients B.II.3, B.II.4 and C.II.1, variants were filtered with the in-house Variant  
129 Analysis and filtration Tool software (VarAFT; [varaft.eu](http://varaft.eu)). Variant filtering followed the  
130 following criteria: i) variants affecting the coding sequence, including splicing and ii)  
131 rare variants (<1% allele frequency) from public databases (see URLs), iii)  
132 homozygous, compound heterozygous or *de novo* variants. The candidate variants in  
133 *UNC45A* were confirmed by Sanger sequencing on a 3500XL Genetic Analyzer®  
134 (ThermoFisher, Carlsbad, CA).

135

### 136 **Western blotting**

137 Fibroblasts of patient B.II.3 and all the patients' lymphoblastoid cells (A.II.2, B.II.3,  
138 B.II.4 and C.II.1) were lysed by NP40 cell lysis buffer (ThermoScientific, Rockland, IL,  
139 USA) complemented with Halt Proteases and Phosphatases Inhibitor Cocktail 100X

140 (ThermoScientific, Rockland, IL, USA). After incubation on ice for 30 min, lysed cells  
141 were sonicated (4 cycles 15s on/15s off), then centrifuged at 16000g for 10min at  
142 4°C. The supernatant was collected and analyzed for protein concentration by Pierce  
143 BCA Protein Assay (ThermoScientific, Rockland, IL, USA). Whole lysates of  
144 fibroblasts and lymphoid cells (40µg per lane) were loaded onto a SDS-PAGE 10%  
145 Bis-Tris gel (Bio-rad, Hercules, CA, USA) for electrophoresis and transferred to a  
146 PVDF membrane. The membranes were hybridized with monoclonal mouse anti-  
147 human UNC45A antibody (1/1000; ADI-SRA-1800, Enzo Life Sciences, Farmingdale,  
148 NY, USA) and with Rabbit anti-human Glyceraldehyde-3-phosphate dehydrogenase  
149 polyclonal Antibody (1/10000) (as loading control; Flarebio Biotech llc, USA).

150

### 151 ***In vivo* Zebrafish Assays**

152 All animal work was performed with approved protocols from Duke's Institutional  
153 Animal Care and Use Committee. To determine the effect of *unc45a* suppression in  
154 zebrafish, we designed a splice blocking morpholino (MO) against exon 3 of the  
155 zebrafish *unc45a* (ENSDART00000159409.1). To assess efficiency of the MO, we  
156 extracted total RNA from control and MO injected embryos and performed RT-PCR  
157 across the site targeted by the MO, followed by sequencing of the RT-PCR products.  
158 For the rescue experiments, we *in vitro* transcribed human WT and V423N-encoding  
159 mRNA using the SP6 mMessage mMachine kit (Ambion). All injections were done at  
160 the 1-4 cell stage and each experiment was performed in triplicate as described <sup>14</sup>.

161 Fluorescent microsphere gavage was performed on 5dpf zebrafish anesthetized in  
162 tricaine and mounted in 3% methylcellulose. Injection of Fluoresbrite polychromatic  
163 red 2.0 micron microspheres (Polysciences #19508) was gavaged into the zebrafish  
164 intestinal lumen as described <sup>15</sup>. Brightfield and gavage images were taken of 5dpf

165 embryos using the Nikon AZ100 microscope with a 2x objective and a 5.0-megapixel  
166 DS-Fi1 digital camera as previously described<sup>16</sup>.

167 Serial sections of the zebrafish were obtained by mounting in 3% low-melting point  
168 agarose and sections on a vibratome. Standard immunohistochemistry was  
169 performed using Phalloidin and 4e8 (both used at 1:1000 dilution). Sections were  
170 mounted onto a coverslip using vectashield and imaged on a Nikon Eclipse 90i with a  
171 C2-SH camera at 20X. Image analyses and statistics were performed as previously  
172 described<sup>17</sup>.

173

## 174 **Results**

### 175 **Clinical report**

176

177 All four probands share multiple clinical symptoms including congenital cholestasis,  
178 diarrhea, bone fragility with recurrent fractures and deafness (Figure 1; see detailed  
179 clinical report in “Supplemental note: Case reports”). They were assembled together  
180 after the discovery of independent homozygous or compound heterozygous variants  
181 of *UNC45A*, following a genotype-first approach.

### 182 **Family A**

183 The proband is a 5-year-old girl of European descent, the second child of unrelated  
184 parents with no family history of digestive disease. She presented intractable  
185 diarrhea requiring parenteral nutrition since her fourth day of life. Her evolution was  
186 marked by language delay partially linked to severe bilateral perception deafness;



187 she is still with parenteral nutrition. To date, there is no sign of bone fragility or of liver  
188 disease.

189

## 190 **Family B**

191 Two probands are siblings from unrelated parents, originating from Tunisia. There  
192 was no known family history of the clinical presentation observed in the two  
193 probands. They have one sister and one brother, both of whom are healthy and have  
194 normal height. CGH array did not detect any chromosome rearrangements, and  
195 targeted sequencing of known disease genes did not reveal any candidate  
196 pathogenic variants.

197 Patient B.II.3, currently 23 years old, presented at 15 days of life icteric cholestasis  
198 with normal GGT level. Icterus disappeared at 2.5 years, but elevated levels of bile  
199 acid associated with intractable pruritus remained, leading to partial internal biliary  
200 diversion at the age of 19 allowing an amelioration of the pruritus. She presented  
201 bone fragility: 23 fractures with normal levels of PTH and vitamin D. Severe bilateral  
202 perception deafness was diagnosed in her fifth year. She presented a failure to thrive  
203 with a current weight of 38.5 kg and height of 147.5 cm and a slight intellectual  
204 disability. (See full report in Supplemental Data).

205 Patient B.II.4, currently 18 years old, presented an icteric cholestasis with elevated  
206 GGT at 7 days of life. Like her sister, icterus resolved at 3 years, but cholestasis with  
207 elevated level of GGT remained as well as elevated levels of bile acid associated  
208 with intractable pruritus. These issues led to partial internal biliary diversion at the  
209 age of 12, allowing an amelioration of the pruritus. She had bone frailty with multiple  
210 fractures and osteonecrosis of the femoral head at the age of 14, secondary to left  
211 hip dysplasia at birth and normal calcium phosphate, D vitamin a PTH levels.

212 Perception deafness was discovered in her teens. Initially, she presented diarrhea  
213 requiring parenteral and enteral nutrition. Diarrhea resolved with time, but a failure to  
214 thrive persisted at the last evaluation with a weight of 38.5kg (-3SD) and a height of  
215 147.5cm (-2.5SD) and a mild intellectual disability was noted like her sister.

216

### 217 **Family C**

218 The proband is a 5-year-old female born to unrelated parents of Turkish origin. The  
219 father is carrier of a polyglobulia. After 15 days of life, the proband presented with  
220 cholestatic icterus with normal level of GGT associated with liver failure; both  
221 resolved at 4 months of life. She presented bone fragility with two spontaneous  
222 fractures, with normal calcium phosphate, PTH and D vitamin levels. She had  
223 diarrhea since the age of 2 months, requiring parenteral nutrition. She is still with  
224 parenteral nutrition and has had recurrent episodes of cytolytic.

225

### 226 **Whole Exome Sequencing of family A and B identified variants in**

#### 227 **UNC45A**

228 We adopted a genetic approach for the study of a case of intractable diarrhea. The  
229 sporadic case in Family A, was found in a large cohort of patients without genetics  
230 diagnosis. This study was part of an “undiagnosed program” focusing on the  
231 identification of the genetic basis of pathologies in more than 500 affected  
232 individuals.

233 The exome sequencing of this family was first analyzed following a trio strategy. The  
234 autosomal *de novo* hypothesis allowed the identification of a *de novo* c.1268T>A;  
235 p.Val423Asp variant in *UNC45A*. A second analysis under an autosomal recessive  
236 hypothesis identified nine genes with homozygous or compound heterozygous

237 variants in their coding region. *UNC45A* and *CLRN2* were considered the strongest  
238 candidates: neither has been associated to date with a clinical phenotype in human  
239 disease and only the variant in *UNC45A* c.784C>T; p.Arg262\* encodes a nonsense  
240 allele. Among the remaining genes, two have been associated with a human  
241 pathology: *FRAS1* [MIM: 607830] and *MYO15A*. Frasier syndrome can be likely  
242 excluded due to the divergent clinical presentation, while *MYO15A* formally remains a  
243 candidate for the deafness phenotype of the patient. However, there are no  
244 functional clues about the variant in *MYO5B*, which is thus classified as a variant of  
245 unknown significance (VUS). Sanger sequencing for the discovered *UNC45A*  
246 mutations confirmed that the missense variant was inherited from the father and the  
247 stop-gained mutation was *de novo* (compound heterozygous status).

248 Independently, we performed whole exome sequencing on genomic DNA from  
249 individual B.II.3 and B.II.4 and their parents B.I.1 and B.I.2 (Family B; Figure 1). The  
250 trio-based analysis did not identify likely clinically relevant variants in known disease-  
251 associated genes. Under the hypothesis of either an autosomal recessive or *de novo*  
252 dominant mode of transmission, a search for homozygous, compound heterozygous  
253 or *de novo* rare variants (<0.1% in ExAC Browser and GnomAD) allowed us to  
254 identify a unique mutated gene shared by the two sisters: *UNC45A*, a locus not yet  
255 associated with any known human genetic disorder. Our exome findings and the high  
256 predicted expression levels of *UNC45A* in bone, colon and liver (Proteomics DB),  
257 rendered this locus a strong candidate. The three identified *UNC45A* variants were  
258 confirmed by Sanger sequencing and their segregation was consistent with an  
259 autosomal recessive trait (Fig. 1). The two missense c.2633C>T; p.Ser878Leu and  
260 c.2734; p.Cys912Gly and the nonsense c.2584C>T; p.Gln861\* mutations are all  
261 predicted to be damaging by UMD Predictor<sup>18; 19</sup>. They are not found in gnomAD

262 database, except for the variant c.2633C>T; p.Ser878Leu which is reported seven  
263 times in the heterozygous state (7/277162).

264 Biallelic *UNC45A* variants were the only sites shared among the two unrelated  
265 families with overlapping phenotypic features, thereby bolstering our interest for a  
266 likely causal association of *UNC45A* variants with the disease presentation.

267

### 268 **Additional families with phenotypic match: discovery of family C**

269 We added *UNC45A* to our candidate gene list and we reanalyzed the exomes of  
270 families without molecular diagnosis with phenotypes similar to those exhibited by  
271 individuals of families A and B. We discovered two missense mutations in a third  
272 unrelated family presenting liver disease and bone frailty. Specifically, in family C, we  
273 identified two missense mutations c. 247C>T; p.Arg83Trp and c.983G>T;  
274 p.Gly328Val in *UNC45A* (Figure 1). These substitutions are predicted to be  
275 damaging; one is only found four times (frequency of 4/276948) in heterozygotes,  
276 whereas the second one has never been reported in gnomAD Browser. Given the  
277 overlap of clinical features of individual C.II.1 with the clinical spectrum of the other  
278 patients described here, these results provided further evidence for a causal  
279 association of biallelic *UNC45A* mutations with this phenotypic presentation.

280

### 281 **Functional impact of variants found in *UNC45A* on protein level**

282 To investigate whether these alleles have an effect on protein abundance, we  
283 performed Western blot using a monoclonal antibody against *UNC45A* in all the  
284 lymphoblastoid cell lines available in our cohort. We detected *UNC45A* at the  
285 predicted size of 103KDa; quantification of the observed signal in each patient (and  
286 the parents of the patient C.II.1) showed a decrease of *UNC45A* abundance across

287 all patients' lymphoblastoid cells. Specifically, a significant decrease of protein  
288 abundance in each of, A.II.2 B.II.3, B.II.4, C.II.1, (80%, 93%, 89%, 70%, decrease  
289 respectively) compared to control cells (Figure 2 C, D). Furthermore, we did not  
290 detect any signal at ~70KDa, which would have corresponded to the truncated  
291 protein translated from the *UNC45A* allele carrying the nonsense mutation p.Gln861\*,  
292 suggesting that the truncated protein product is unstable. Regarding nonsense  
293 variant p.Arg262\* in patient A, which maps to exon 11, we likewise did not detect any  
294 truncated protein. However, we cannot formally exclude the possibility of a truncated  
295 protein since we do not know the lowest detection threshold of our assay; this data  
296 suggests there is nonsense mediated mRNA decay (NMD). Of note, in Family C,  
297 father C.I.2 who is heterozygous for p.Arg83Trp and the mother C.I.2 who is  
298 heterozygous for p.Val423Asp, also had reduced *UNC45A* levels (45%, and 52%  
299 respectively), also indicating that these alleles are associated with reduced protein  
300 expression level and lead to the abrogation of protein stability. Together, all these  
301 studies suggest a loss of protein abundance/activity paradigm and thus a loss of  
302 function disorder.

303 We next asked whether the reduction of *UNC45A* expression was restricted to  
304 lymphoblastoid cells. Using whole cell lysates from patient B.II.3 fibroblasts, we  
305 observed an 82% decrease of *UNC45A* compared to control cells (Figure 2 A, C).  
306 Similar to the previous experiment, we could not detect any signal that might  
307 represent the truncated protein, again suggesting NMD. Quantification of the  
308 *UNC45A* mRNA produced in these cells was consistent with this notion; we observed  
309 a 40% and 50% decrease of transcripts levels in lymphoblastoid cells of patients  
310 B.II.3 and B.II.4 respectively (Figure S3).

311

312 **In vivo functional testing of the UNC45A variation in zebrafish**

313 With the identification of *UNC45A* likely loss of function mutations in patients with  
314 O2HE syndrome, we next sought to ask whether dysfunction of this gene contributes  
315 to experimentally tractable aspects of the phenotype. We have shown previously the  
316 utility of the zebrafish system to assess the involvement of genetic lesions in the  
317 formation and function of the gut<sup>14; 20; 21</sup>. The zebrafish locus is predicted to encode  
318 three splice isoforms of *unc45a*; we focused our studies on the canonical (longest)  
319 isoform (ENSDART00000159409.1) which is 64% identical to human UNC45A  
320 (ENSG00000140553); the other two isoforms are shorter (230aa and 218 aa versus  
321 935 AA for the canonical isoform) (Figure S8 and S9). We designed a MO against the  
322 splice donor site of zebrafish *unc45a* exon 3. This resulted in the inclusion of intron 3,  
323 leading to a premature stop.

324 To assess one of the primary clinical phenotypes of our patients, congenital  
325 diarrhea, we tested the effects of suppression of *unc45a* on both enteric neurons and  
326 intestinal motility. We first asked whether this phenotype could be caused by a  
327 neurodevelopmental enteric defect. We therefore visualized and counted the neurons  
328 along the zebrafish gut by staining with antibodies against HuC/D. In triplicate  
329 experiments performed blind to injection cocktail, we could not detect any  
330 appreciable difference in the number of enteric neurons in morphants versus  
331 controls, suggesting that *unc45a* suppression does not impact neurodevelopment in  
332 the gut (data not shown). Next, we assayed intestinal motility by fluorescent  
333 microsphere gavage into the anterior intestine of 5 dpf (days post fertilization)  
334 embryos<sup>15; 16</sup>, followed by recording of the rate of intestinal motility of the  
335 microspheres as a function of time (imaging at 0, 3, 6, 9 and 24 hrs). At each time  
336 point we scored in which intestinal zone (1-4, based on anatomical landmarks) the

337 fluorescent microspheres were located as a measurement of transit through the  
338 intestine post-gavage. Performing ordinal logistic regression and repeated measures  
339 analysis, we saw that, as time progresses, control larvae are less likely to have  
340 microspheres remaining in their intestinal lumen compared to morphants ( $p < 0.0001$ ;  
341  $OR = 0.504$ ), with a majority of morphants having microspheres remaining in their  
342 intestine after 24 hours post gavage. These data suggest that suppression of *unc45a*  
343 leads to an intestinal motility defect (Figure 3).

344 To test this observation further, we turned our attention to a stable genetic  
345 model. We obtained the *kurzschlussstr12* (*kus<sup>tr12</sup>*) zebrafish mutant, an aortic arch  
346 mutant identified previously in a forward genetic screen caused by a nonsense  
347 mutation in *unc45a*<sup>22</sup>. Although gut motility phenotypes had not been reported  
348 previously, such phenotypes are not readily observable; we therefore tested mutants  
349 directly by gavage of fluorescent pellets, followed by measurement of the clearance  
350 efficiency of these along the alimentary canal as a function of time. Specifically, we  
351 divided the gut into four anatomically-defined zones and we measured the proportion  
352 of embryos that had GFP present in each zone. Consistent with our exome findings,  
353 *kus<sup>tr12</sup>* mutants had a significant delay in clearing fluorescence that was even more  
354 pronounced than what we observed in our morphants. Repeated measures analysis  
355 showed that as time progresses, control larvae are less likely to have microspheres  
356 in their intestinal lumen (the majority of had no microspheres in their intestines)  
357 compared to *kus<sup>tr12</sup>* fish ( $p = 0.0009$ ;  $OR = 0.1387$ ) with the majority of the microspheres  
358 in the *kus<sup>tr12</sup>* larvae remaining in zone 2 (compared to morphants that showed  
359 accumulations primarily in zones 3 and 4 (Figure 3). The observed motility defect was  
360 not due to dysfunctional peristalsis, as there was no appreciable peristalsis defect in  
361 *kus<sup>tr12</sup>* mutants (data not shown).

362 We next asked if the intestinal motility defect could be linked to structural  
363 defects. Observations of control and mutant animals under brightfield showed a lack  
364 of folds in the intestine of  $kus^{tr12}$  fish. We therefore performed serial sections and  
365 used markers for F-actin (Phalloidin) and intestinal brush borders (4e8) to determine  
366 if the defects in intestinal motility we observe in the mutant larvae were the result of  
367 structural abnormalities. Analysis of  $kus^{tr12}$  mutant and control serial sections,  
368 revealed defects in the structure of zone 2 and 3 of  $kus^{tr12}$  animals (Figure 4).  
369 Staining with Phalloidin revealed that, as opposed to having the expected epithelial  
370 folds lining the lumen,  $kus^{tr12}$  mutant intestinal tubes are devoid of folds in zone 2 and  
371 3, corresponding to the anterior intestine. The differences in structure were restricted  
372 to, and specific for, zones 2 and 3; there were no structural differences in zone 4 and  
373 no brush border defects observed in the  $kus^{tr12}$  embryos, as their enterocytes  
374 maintained the expression and localization of 4e8, the absorptive cell marker.

375 Given these phenotypes, we proceeded to test the functionality of the alleles  
376 discovered in our cohort. In the Family A, the proband was a compound heterozygote  
377 for p.Arg262\* and p.Val423Asp, the first mutation being considered to encode a null  
378 allele. We therefore modeled p.Val423Asp. To reduce the phenotypic variability that  
379 we have sometimes found in morphants, we focused our studies on the of  $kus^{tr12}$   
380 homozygous mutants. Specifically, we injected both human wildtype (WT) and  
381 V423N encoding mRNA into  $kus^{tr12}$  embryos at the 1-4 cell stage and we assessed  
382 their ability to improve the structural phenotypes observed in zone 2 of 5dpf mutant  
383 guts. Injection of WT human mRNA was able to ameliorate the observed fold defects.  
384 In contrast, human p.Val423Asp mRNA injected  $kus^{tr12}$  larvae were 3.44 times more  
385 likely to have no folds in zone 2 than  $kus^{tr12}$  mutants injected with WT mRNA (Figure  
386 5,  $p=0.005$ ;  $OR=3.441$ ), with modest overall amelioration of the mutant phenotype.



387 Human WT mRNA was unable to rescue zone 3, likely because it forms somewhat  
388 later in development at which point the injected mRNA is mostly extinguished, while  
389 zone 4 gave no pathology in mutants and therefore served as an indirect quality  
390 control for specificity. Taken together, these data suggested that UNC45A plays a  
391 role in the development of a functional intestinal system and that the *UNC45A* variant  
392 p.Val423Asp identified in family A likely results in minimal (but not fully extinguished)  
393 UNC45A activity.

394

## 395 **Discussion**

396 We report a hitherto undescribed constellation of phenotypes that we propose to  
397 represent a distinct clinical entity, Osteo-Oto-Hepato-Enteric syndrome (O2HE). The  
398 main clinical features of O2HE syndrome include congenital diarrhea, congenital  
399 cholestasis, bone fragility and deafness. In our families' exomes, no mutations were  
400 found in genes previously known to be involved in cholestasis, brittle bones, or  
401 chronic diarrhea. Together, our *in vitro* and *in vivo* data provide strong evidence that  
402 loss of UNC45A function results in a previously unpublished clinical pathology, that  
403 includes loss of normal digestive intestinal transit.

404 Based on current knowledge, there is no obvious link between the clinical expression  
405 observed in the affected individuals in the three families and UNC45A function. Most  
406 studies of *unc45* have been performed in *Caenorhabditis elegans*. However,  
407 invertebrates have a single *unc-45* gene that is expressed in both muscle and non-  
408 muscle tissues, whereas vertebrates possess one gene expressed in striated muscle  
409 (*UNC45B*) and another that is expressed more ubiquitously (*UNC45A*). In fact the  
410 phylogeny of UNC-45 homologues showed that this protein family appeared in the

411 Holozoa lineage (Figure S4) and has undergone a duplication event in an ancestor of  
412 Vertebrates. This event allowed the specialization of the two resulting paralogues: the  
413 muscle *Unc45B* and ubiquitous *Unc45A*. This divergence might explain the absence  
414 of skeletal muscle pathology in the three families studied here, although additional  
415 affected individuals will be required to define the full range of the clinical pathologies  
416 associated with *UNC45A* mutations in humans.

417 *UNC45A* belongs to the UCS protein family (***UNC-45/CRO1/She4p***). *C.*  
418 *elegans unc-45* was first described after a screening for mutations causing motility  
419 disorders (UNC stands for uncoordinated) <sup>23</sup>. The UNC-45 protein has three  
420 recognizable domains: an N-terminal tetratricopeptide repeat (TRP) domain (~115  
421 amino acids); a central domain of ~ 400 amino acids and a C-terminal UCS domain  
422 (~400 amino acids) <sup>23; 24</sup>. The TPR domain participates in protein-protein interactions,  
423 especially with Hsp70 (HSPA1A [MIM 140550]) and Hsp90 HSP90AA1 [MIM:  
424 140571]) <sup>25</sup>. The role of the central domain remains unclear, while the C-terminal  
425 UCS domain is critical for myosin binding <sup>24</sup>. Whether or not variants located within  
426 specific domains of *UNC45A* lead to different functional outcomes is still unknown.  
427 *UNC45A* appears to be ubiquitously expressed and has been postulated to be  
428 involved in cytoskeletal functions, such as cell division or exocytosis <sup>26; 27</sup>. These data  
429 are consistent with the multi-organ defects observed in our affected individuals, as  
430 well as the structural pathology in the gut of our zebrafish mutants. However other  
431 features of the protein are not reflected in the phenotype seen in humans. For  
432 example, *UNC45A* co-localizes with type II muscle myosin heavy chain B as well as  
433 type V myosins and plays an essential role in myoblast fusion and cell proliferation <sup>28-</sup>  
434 <sup>31</sup>. However, none of our affected individuals present muscular alterations; none have  
435 muscle weakness and all present normal Creatine Phosphokinase level. Recently, *in*

436 *vivo* studies have reported that *unc45a* plays a role in aortic arch development and  
437 could be one underlying cause of human vessel malformations<sup>22</sup>. This, coupled to  
438 reports that individuals with visceral arteriovenous malformations can be more  
439 susceptible to cholestasis<sup>32</sup> makes UNC45A an attractive candidate; however none  
440 of the people in our study display vessel malformation. Although this might be due to  
441 differences in development and physiology between lower organisms and humans,  
442 we favor the hypothesis in which minimal activity of the human alleles (in contrast to  
443 null homozygous zebrafish embryos) might protect from this pathology. The  
444 discovery of additional mutations at this locus will help clarify these questions.

445 There is a core phenotype: four main signs seen at least in three patients (Figure 1,  
446 C). Phenotypic variability is observed in the three families studied here; however this  
447 is seen in other congenital diseases (for example Microvillus Inclusion Disease or  
448 Tricho-Hepato-Enteric Syndrome) and expected in such complex diseases. The four  
449 patients present some degree of developmental delay but, we can't exclude that it is  
450 a non-specific symptom. Indeed in the patients A.II.2, B.II.3 and B.II.4, the delay  
451 could be a secondary effect of the deafness. There are also some isolated signs,  
452 such as the tubulopathy and poor glycemic regulation found in patient C.II.1 and the  
453 hydrocephalus-related to stenosis of the aqueduct of Sylvius and the vesico-ureteral  
454 reflux found in individual B.II.4. It remains unclear whether these isolated signs are  
455 related to *UNC45A* or not. The clinical heterogeneity could reflect differing degrees of  
456 functional deficiency resulting from distinct effects of each mutation on *UNC45A*  
457 expression/stability on different tissues. Although we observe similar protein  
458 expression levels in lymphoblastoid cells, we cannot exclude that the mutations could  
459 have a differential impact on specific tissues. The variable expressivity could also be  
460 impacted by modifiers, epigenetics, or environmental factors.

461 In conclusion, our study finds a strong association between *UNC45A* loss of function  
462 mutations and a new syndrome, Osteo-Oto-Hepato-Enteric (O2HE) syndrome.  
463 According to previous reports, *UNC45A* is possibly associated with the cytoskeleton  
464 and further evidences need to be accumulated to understand the molecular  
465 mechanisms underlying the O2HE syndrome.

#### 466 **Supplemental Data**

467 Supplemental Data include nine figures and a Supplemental Note: Case Reports.

468

#### 469 **Acknowledgments**

470 We are grateful to all the affected individuals and their families who participated in  
471 this study. We also thank Erica Davis and Michael Mitchell for critical reading of the  
472 manuscript and helpful suggestions and Nathalie Colavolpe for her help with X-Ray.  
473 This work was support in part by grants from the « Fondation Maladies Rares »,  
474 AMGORE (« Association Méditerranéenne pour les Greffes d'ORganes aux  
475 Enfants »), the Regional Council of Burgundy (PARI 2014) and the patient support  
476 group Association Romy - La vie par un fil.

#### 477 **Web Resources**

478 UMD predictor <http://umd-predictor.eu/>

479 VarAFT <http://varaft.eu>

480 genome Aggregation Database (c) [www.gnomad.broadinstitute.org](http://www.gnomad.broadinstitute.org)

481 ExAC [www.exac.broadinstitute.org](http://www.exac.broadinstitute.org)

482 1000Genomes <http://www.internationalgenome.org/1000-genomes-browsers/>

483 PolyPhen-2 <http://genetics.bwh.harvard.edu/pph2/>

484 Mutation Taster <http://www.mutationtaster.org/>

485 Mutalyzer 2.0.26 <https://mutalyzer.nl/>

486 Fiji (*Fiji Is Just ImageJ*) software

487 OMIM database <https://www.omim.org>

488 MAFFT [mafft.cbrc.jp](http://mafft.cbrc.jp)

489 BMGE [pasteur.fr/pub/GenSoft/projects/BMGE/](http://pasteur.fr/pub/GenSoft/projects/BMGE/).

490 NCBI <https://www.ncbi.nlm.nih.gov>

491 CLUSTAL <https://www.ebi.ac.uk/Tools/msa/clustalo/>

492

## 493 **References**

494 1. Muller, T., Hess, M.W., Schiefermeier, N., Pfaller, K., Ebner, H.L., Heinz-Erian, P.,  
495 Ponstingl, H., Partsch, J., Rollinghoff, B., Kohler, H., et al. (2008). MYO5B mutations  
496 cause microvillus inclusion disease and disrupt epithelial cell polarity. *Nature genetics*  
497 40, 1163-1165.

498 2. Gonzales, E., Taylor, S.A., Davit-Spraul, A., Thebaut, A., Thomassin, N., Guettier,  
499 C., Whittington, P.F., and Jacquemin, E. (2017). MYO5B mutations cause cholestasis  
500 with normal serum gamma-glutamyl transferase activity in children without  
501 microvillous inclusion disease. *Hepatology* 65, 164-173.

502 3. Qiu, Y.L., Gong, J.Y., Feng, J.Y., Wang, R.X., Han, J., Liu, T., Lu, Y., Li, L.T.,  
503 Zhang, M.H., Sheps, J.A., et al. (2017). Defects in myosin VB are associated with a  
504 spectrum of previously undiagnosed low gamma-glutamyltransferase cholestasis.  
505 *Hepatology* 65, 1655-1669.

506 4. Lapierre, L.A., Kumar, R., Hales, C.M., Navarre, J., Bhartur, S.G., Burnette, J.O.,  
507 Provance, D.W., Jr., Mercer, J.A., Bahler, M., and Goldenring, J.R. (2001). Myosin vb  
508 is associated with plasma membrane recycling systems. *Molecular biology of the cell*  
509 12, 1843-1857.

- 510 5. Hales, C.M., Vaerman, J.P., and Goldenring, J.R. (2002). Rab11 family interacting  
511 protein 2 associates with Myosin Vb and regulates plasma membrane recycling. The  
512 Journal of biological chemistry 277, 50415-50421.
- 513 6. Thompson, R.J., and Knisely, A.S. (2014). Microvilli as markers of disordered  
514 apical-membrane trafficking and assembly: bowel and liver. Hepatology 60, 34-36.
- 515 7. Girard, M., Lacaille, F., Verkarre, V., Mategot, R., Feldmann, G., Grodet, A.,  
516 Sauvat, F., Irtan, S., Davit-Spraul, A., Jacquemin, E., et al. (2014). MYO5B and bile  
517 salt export pump contribute to cholestatic liver disorder in microvillous inclusion  
518 disease. Hepatology 60, 301-310.
- 519 8. Davit-Spraul, A., Fabre, M., Branchereau, S., Baussan, C., Gonzales, E., Stieger,  
520 B., Bernard, O., and Jacquemin, E. (2010). ATP8B1 and ABCB11 analysis in 62  
521 children with normal gamma-glutamyl transferase progressive familial intrahepatic  
522 cholestasis (PFIC): phenotypic differences between PFIC1 and PFIC2 and natural  
523 history. Hepatology 51, 1645-1655.
- 524 9. Pawlikowska, L., Strautnieks, S., Jankowska, I., Czubkowski, P., Emerick, K.,  
525 Antoniou, A., Wanty, C., Fischler, B., Jacquemin, E., Wali, S., et al. (2010).  
526 Differences in presentation and progression between severe FIC1 and BSEP  
527 deficiencies. Journal of hepatology 53, 170-178.
- 528 10. Fabre, A., Charroux, B., Martinez-Vinson, C., Roquelaure, B., Odul, E., Sayar, E.,  
529 Smith, H., Colomb, V., Andre, N., Hugot, J.P., et al. (2012). SKIV2L mutations cause  
530 syndromic diarrhea, or trichohepatoenteric syndrome. American journal of human  
531 genetics 90, 689-692.
- 532 11. Monies, D.M., Rahbeeni, Z., Abouelhoda, M., Naim, E.A., Al-Younes, B., Meyer,  
533 B.F., and Al-Mehaidib, A. (2015). Expanding phenotypic and allelic heterogeneity of  
534 tricho-hepato-enteric syndrome. Journal of pediatric gastroenterology and nutrition  
535 60, 352-356.
- 536 12. Rider, N.L., Boisson, B., Jyonouchi, S., Hanson, E.P., Rosenzweig, S.D.,  
537 Cassanova, J.L., and Orange, J.S. (2015). Novel TTC37 Mutations in a Patient with  
538 Immunodeficiency without Diarrhea: Extending the Phenotype of Trichohepatoenteric  
539 Syndrome. Frontiers in pediatrics 3, 2.
- 540 13. Thevenon, J., Milh, M., Feillet, F., St-Onge, J., Duffourd, Y., Juge, C., Roubertie,  
541 A., Heron, D., Mignot, C., Raffo, E., et al. (2014). Mutations in SLC13A5 cause  
542 autosomal-recessive epileptic encephalopathy with seizure onset in the first days of  
543 life. American journal of human genetics 95, 113-120.
- 544 14. Davis, E.E., Frangakis, S., and Katsanis, N. (2014). Interpreting human genetic  
545 variation with in vivo zebrafish assays. Biochimica et biophysica acta 1842, 1960-  
546 1970.

- 547 15. Cocchiaro, J.L., and Rawls, J.F. (2013). Microgavage of zebrafish larvae. Journal  
548 of visualized experiments : JoVE, e4434.
- 549 16. Bonora, E., Bianco, F., Cordeddu, L., Bamshad, M., Francescato, L., Dowless,  
550 D., Stanghellini, V., Cogliandro, R.F., Lindberg, G., Mungan, Z., et al. (2015).  
551 Mutations in RAD21 disrupt regulation of APOB in patients with chronic intestinal  
552 pseudo-obstruction. *Gastroenterology* 148, 771-782 e711.
- 553 17. Bainbridge, M.N., Davis, E.E., Choi, W.Y., Dickson, A., Martinez, H.R., Wang, M.,  
554 Dinh, H., Muzny, D.M., Pignatelli, R., Katsanis, N., et al. (2015). Loss of Function  
555 Mutations in NNT Are Associated With Left Ventricular Noncompaction. *Circulation*  
556 *Cardiovascular genetics* 8, 544-552.
- 557 18. Salgado, D., Desvignes, J.P., Rai, G., Blanchard, A., Miltgen, M., Pinard, A.,  
558 Levy, N., Collod-Beroud, G., and Beroud, C. (2016). UMD-Predictor: A High-  
559 Throughput Sequencing Compliant System for Pathogenicity Prediction of any  
560 Human cDNA Substitution. *Human mutation* 37, 439-446.
- 561 19. Frederic, M.Y., Lalande, M., Boileau, C., Hamroun, D., Claustres, M., Beroud, C.,  
562 and Collod-Beroud, G. (2009). UMD-predictor, a new prediction tool for nucleotide  
563 substitution pathogenicity -- application to four genes: FBN1, FBN2, TGFBR1, and  
564 TGFBR2. *Human mutation* 30, 952-959.
- 565 20. Sugathan, A., Biagioli, M., Golzio, C., Erdin, S., Blumenthal, I., Manavalan, P.,  
566 Ragavendran, A., Brand, H., Lucente, D., Miles, J., et al. (2014). CHD8 regulates  
567 neurodevelopmental pathways associated with autism spectrum disorder in neural  
568 progenitors. *Proceedings of the National Academy of Sciences of the United States*  
569 *of America* 111, E4468-4477.
- 570 21. Bernier, R., Golzio, C., Xiong, B., Stessman, H.A., Coe, B.P., Penn, O.,  
571 Witherspoon, K., Gerds, J., Baker, C., Vulto-van Silfhout, A.T., et al. (2014).  
572 Disruptive CHD8 mutations define a subtype of autism early in development. *Cell*  
573 158, 263-276.
- 574 22. Anderson, M.J., Pham, V.N., Vogel, A.M., Weinstein, B.M., and Roman, B.L.  
575 (2008). Loss of unc45a precipitates arteriovenous shunting in the aortic arches.  
576 *Developmental biology* 318, 258-267.
- 577 23. Venolia, L., Ao, W., Kim, S., Kim, C., and Pilgrim, D. (1999). unc-45 gene of  
578 *Caenorhabditis elegans* encodes a muscle-specific tetratricopeptide repeat-  
579 containing protein. *Cell motility and the cytoskeleton* 42, 163-177.
- 580 24. Barral, J.M., Bauer, C.C., Ortiz, I., and Epstein, H.F. (1998). Unc-45 mutations in  
581 *Caenorhabditis elegans* implicate a CRO1/She4p-like domain in myosin assembly.  
582 *The Journal of cell biology* 143, 1215-1225.



- 583 25. Scheufler, C., Brinker, A., Bourenkov, G., Pegoraro, S., Moroder, L., Bartunik, H.,  
584 Hartl, F.U., and Moarefi, I. (2000). Structure of TPR domain-peptide complexes:  
585 critical elements in the assembly of the Hsp70-Hsp90 multichaperone machine. *Cell*  
586 101, 199-210.
- 587 26. Price, M.G., Landsverk, M.L., Barral, J.M., and Epstein, H.F. (2002). Two  
588 mammalian UNC-45 isoforms are related to distinct cytoskeletal and muscle-specific  
589 functions. *Journal of cell science* 115, 4013-4023.
- 590 27. Iizuka, Y., Cichocki, F., Sieben, A., Sforza, F., Karim, R., Coughlin, K., Isaksson  
591 Vogel, R., Gavioli, R., McCullar, V., Lenvik, T., et al. (2015). UNC-45A Is a  
592 Nonmuscle Myosin IIA Chaperone Required for NK Cell Cytotoxicity via Control of  
593 Lytic Granule Secretion. *J Immunol* 195, 4760-4770.
- 594 28. Bazzaro, M., Santillan, A., Lin, Z., Tang, T., Lee, M.K., Bristow, R.E., Shih le, M.,  
595 and Roden, R.B. (2007). Myosin II co-chaperone general cell UNC-45  
596 overexpression is associated with ovarian cancer, rapid proliferation, and motility.  
597 *The American journal of pathology* 171, 1640-1649.
- 598 29. Kachur, T., Ao, W., Berger, J., and Pilgrim, D. (2004). Maternal UNC-45 is  
599 involved in cytokinesis and colocalizes with non-muscle myosin in the early  
600 *Caenorhabditis elegans* embryo. *Journal of cell science* 117, 5313-5321.
- 601 30. Venolia, L., and Waterston, R.H. (1990). The *unc-45* gene of *Caenorhabditis*  
602 *elegans* is an essential muscle-affecting gene with maternal expression. *Genetics*  
603 126, 345-353.
- 604 31. Ao, W., and Pilgrim, D. (2000). *Caenorhabditis elegans* UNC-45 is a component  
605 of muscle thick filaments and colocalizes with myosin heavy chain B, but not myosin  
606 heavy chain A. *The Journal of cell biology* 148, 375-384.
- 607 32. Lerut, J., Orlando, G., Adam, R., Sabba, C., Pfitzmann, R., Klempnauer, J.,  
608 Belghiti, J., Pirenne, J., Thevenot, T., Hillert, C., et al. (2006). Liver transplantation for  
609 hereditary hemorrhagic telangiectasia: Report of the European liver transplant  
610 registry. *Annals of surgery* 244, 854-862; discussion 862-854.

611

## 612 **Figures title and legends**

613

### 614 **Figure 1: UNC45A variants and gene structure**

615 (A) Pedigrees of the three families with mutations in UNC45A. (B) Structural  
616 organization of UNC45A transcript (ENST00000394275) and protein with known  
617 conserved protein domains and localization of amino acid residues affected by  
618 mutations identified in the three families. Exonic (in purple) regions are not drawn to



619 scale. (C) Venn diagram showing the overlap between clinical signs of the four  
620 patients.

621

622 **Figure 2: Western blot detection and quantification of UNC45A protein in**  
623 **controls and patient cells**

624 (A) Detection of UNC45A by Western blot analysis in lymphoblastoid cells and  
625 fibroblasts using a monoclonal antibody. GAPDH was used as a loading control.  
626 Quantification of UNC45A protein levels with Fiji software shows significantly  
627 lowered levels of the expression of UNC45A in all patients' lymphoblastoid cells (B)  
628 and fibroblasts of patient A.II.3 (C). Values are mean ratio +/- SD, n=3; Welch's two  
629 sample t-test (patient vs control) (\* p-value<0.04).

630

631 **Figure 3: Microgavage assay to assess intestinal motility.**

632 Fluorescent microspheres were gavaged and their transit was observed at 0, 3, 6, 9  
633 and 24 hrs. Both morphants and mutant zebrafish for *unc45a* show intestinal mobility  
634 defects.

635

636 **Figure 4: Histological study of transverse sections of zones 2-3 of 5dpf**  
637 **zebrafish.**

638 Markers for F-actin (Phalloidin) and intestinal brush borders (4e8) were used and  
639 revealed defects (lack of epithelial folds in the intestinal tube) in the structure of  
640 *kus<sup>tr12</sup>* larvae compared to controls.

641

642 **Figure 5: Assessment of human UNC45A c.1268T>A, resulting in a p.Val423Asp**  
643 **change (V423N), on zones 2-3 of mutant *unc45a* zebrafishes.**

644 Mutant embryos were injected with either WT or V423N encoding mRNA and  
645 intestinal folds were observed using brightfield microscopy. Mutants injected with WT  
646 encoding mRNA were able to restore folds in zones 2-3 however those injected with  
647 V423N encoding mRNA were not restored, illustrating that V423N is pathogenic.

648

649 **Table**

| Patient         | Exon | Mutation              | gnomeAD frequency | UMD Predictor (score) | Polyphen (score)          | SIFT                      |
|-----------------|------|-----------------------|-------------------|-----------------------|---------------------------|---------------------------|
| A.II.2          | 11   | c.784C>T:p.Arg262*    | 3/277220          | Pathogenic (100)      |                           |                           |
|                 | 14   | c.1268T>A:p.Val423Asp | NS                | Pathogenic (99)       | Probably damaging (0.996) | Affected Protein Function |
| B.II.3 ; B.II.4 | 23   | c.2581C>T:p.Gln861*   | NS                | Pathogenic (100)      |                           |                           |
|                 | 23   | c.2633C>T:p.Ser878Leu | 7/277162          | Pathogenic (99)       | Probably damaging (0.996) | Affected Protein Function |
|                 | 23   | c.2734T>G:p.Cys912Gly | NS                |                       |                           |                           |
| C.II.1          | 8    | c.247C>T:p.Arg83Trp   | 4/276948          | Pathogenic (100)      | Probably damaging (1)     | Affected Protein Function |
|                 | 13   | c.983G>T:p.Gly328Val  | NS                | Pathogenic (100)      | Probably damaging (1)     | Affected Protein Function |

650

651 **Table 1 : *UNC45A* mutations and pathogenicity prediction**

652 Mutations in *UNC45A*, gnomAD (genome Aggregation Database) frequency and  
 653 prediction of the pathogenicity. (NS stand for Never Seen)

654

A

Family A

c.1268T&gt;A; p.Val423Asp

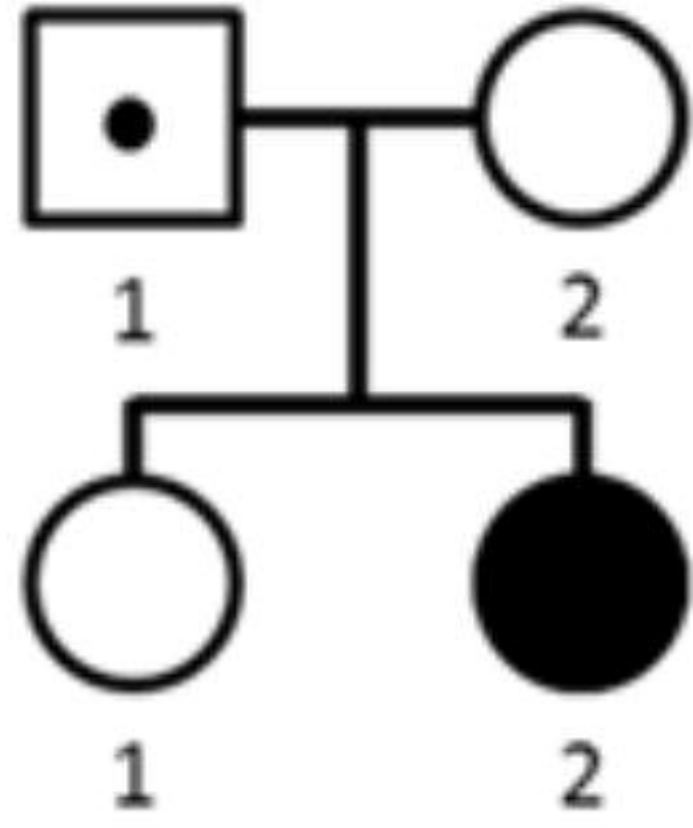c.1268T>A; p.Val423Asp  
c.784C>T; p.Arg262\*

Family B

c.2633C&gt;T; p.Ser878Leu

c. c.2734T&gt;G; p.Cys912Gly

c.2581C&gt;T; p.Gln861\*

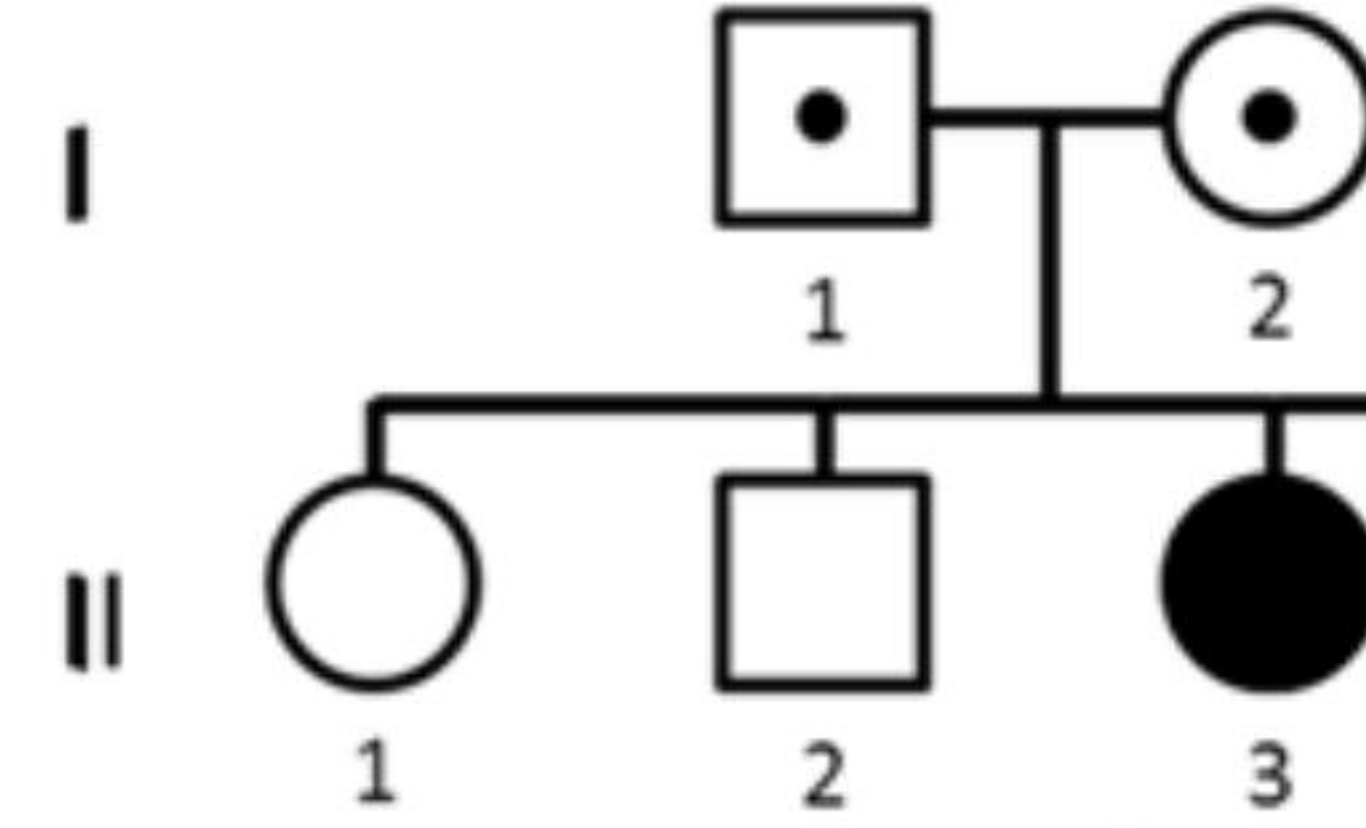

c.2581C&gt;T; p.Gln861\*

c.2581C>T; p.Gln861\*<sup>ip</sup>  
c.2633C>T; p.Ser878Leu  
c.2734T>G; p.Cys912Gly

Family C

c.247C&gt;T; p.Arg83Trp

c.983G&gt;T; p.Gly328Val

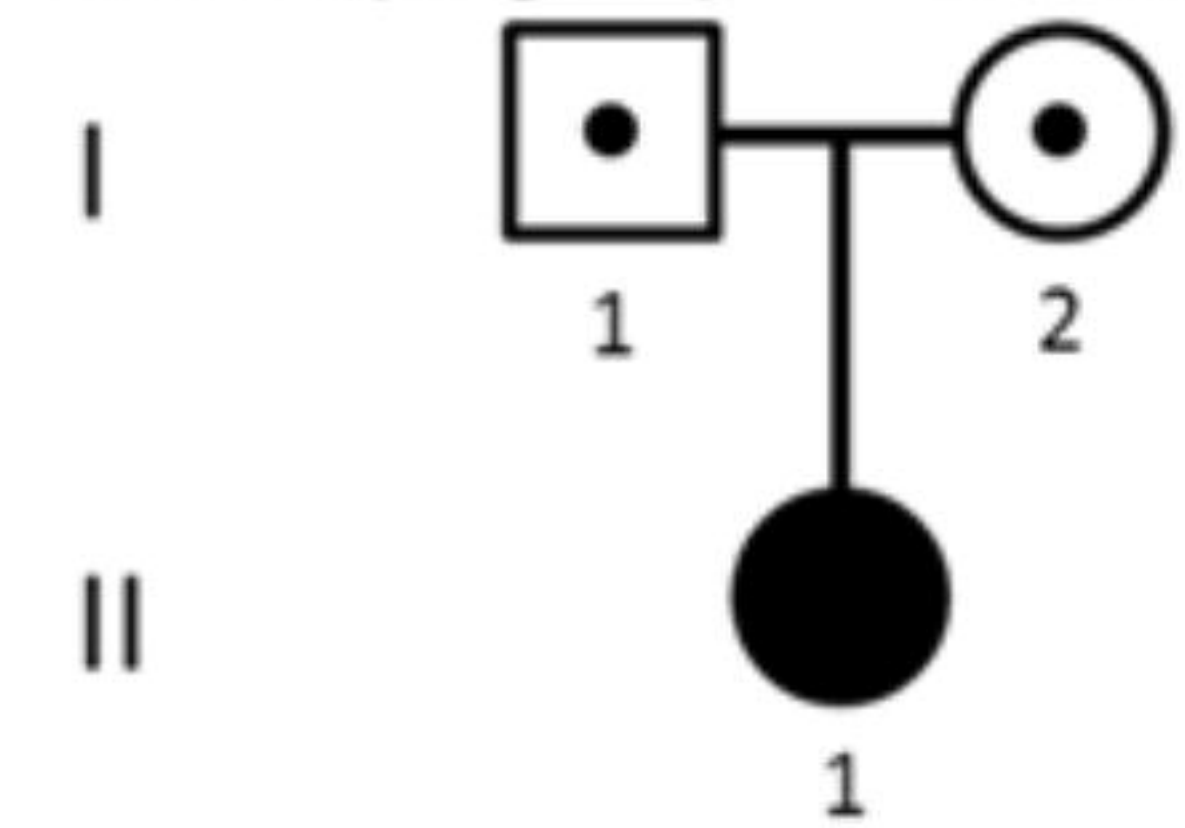c.247C>T; p.Arg83Trp  
c.983G>T; p.Gly328Val

B

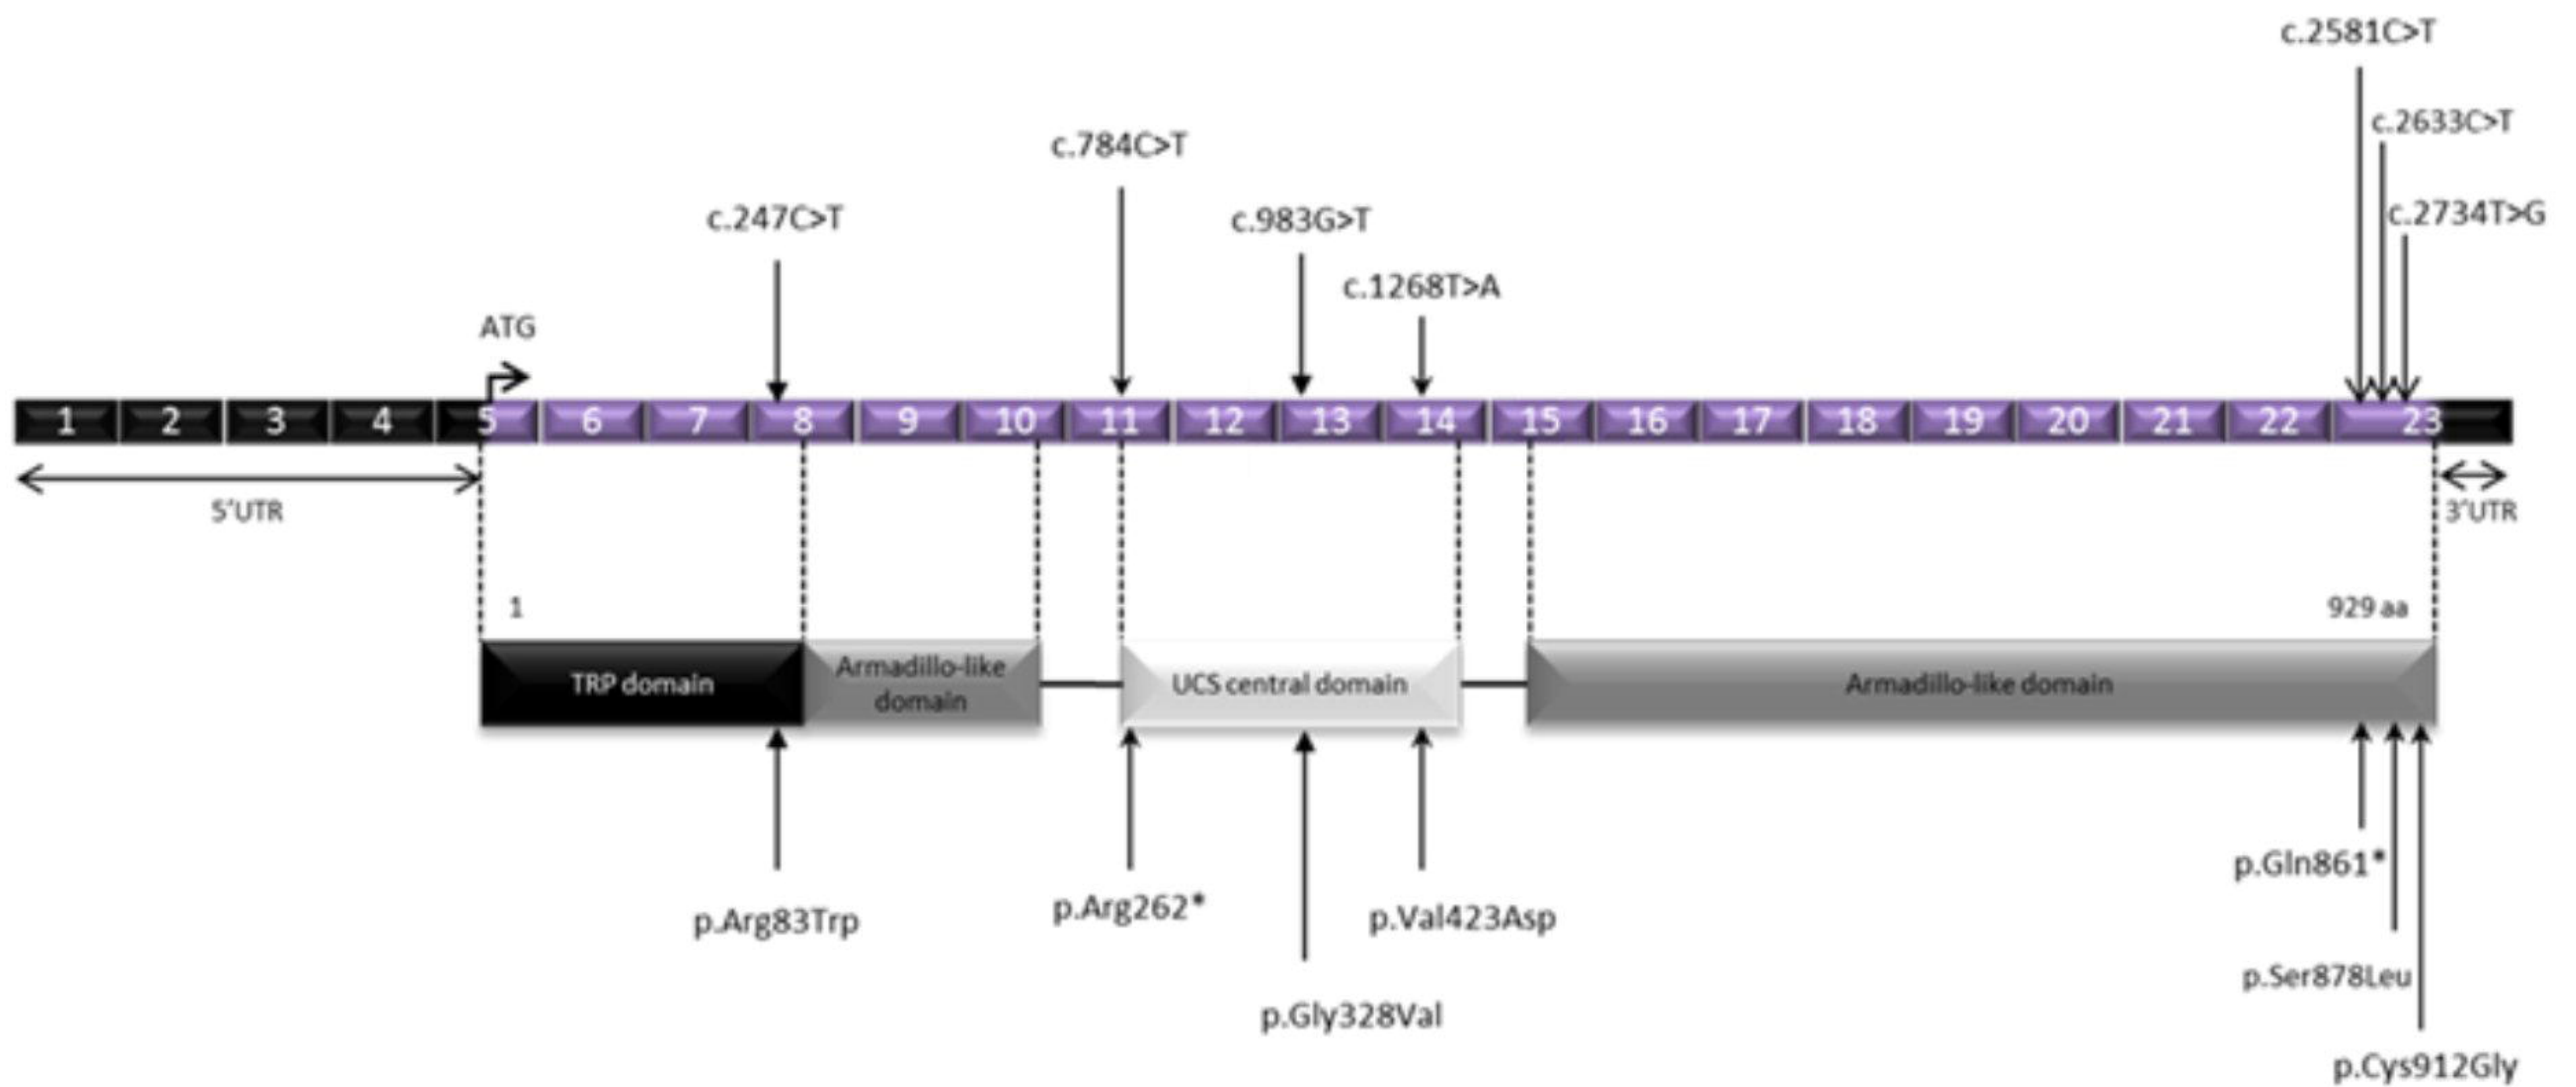

C

Congenital  
cholestasis

Bone Frailty

Diarrhea

Deafness

C.II.1

B.II.3

B.II.4

A.II.2



**A**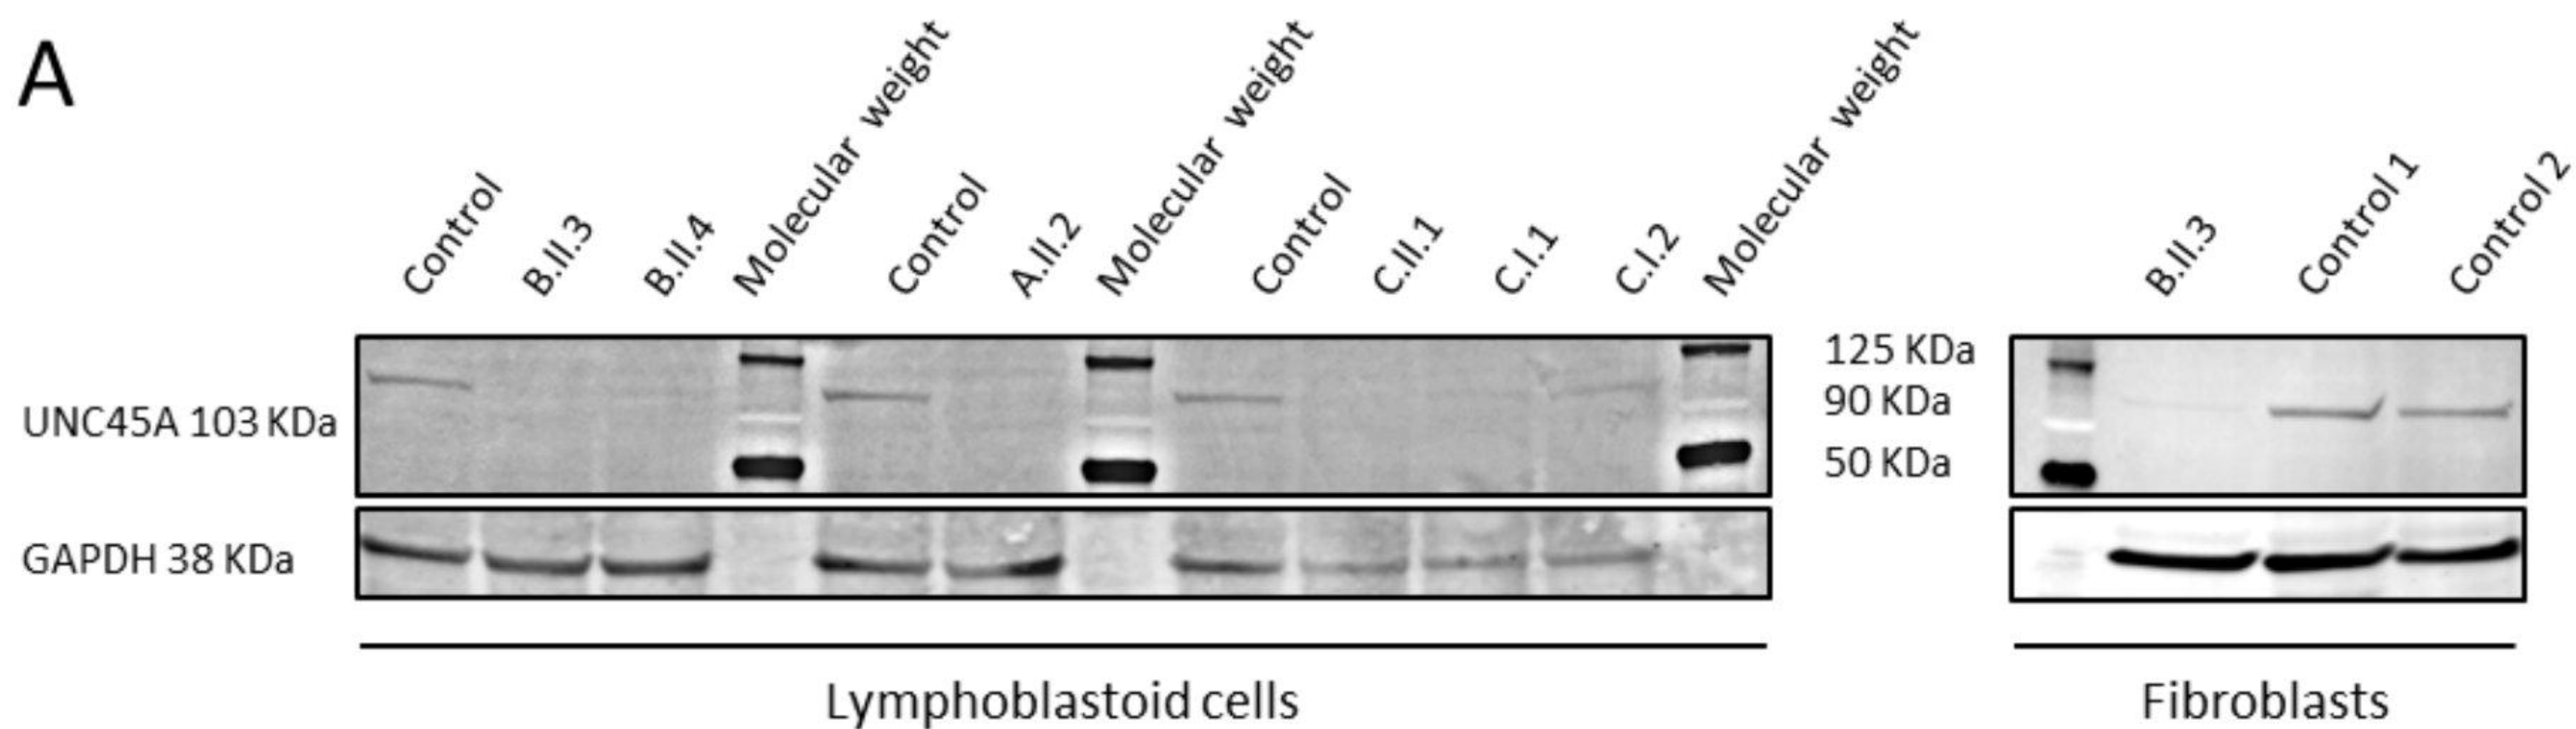**B**

bioRxiv preprint doi: <https://doi.org/10.1101/208942>; this version posted October 26, 2017. The copyright holder for this preprint (which was not certified by peer review) is the author/funder. All rights reserved. No reuse allowed without permission.

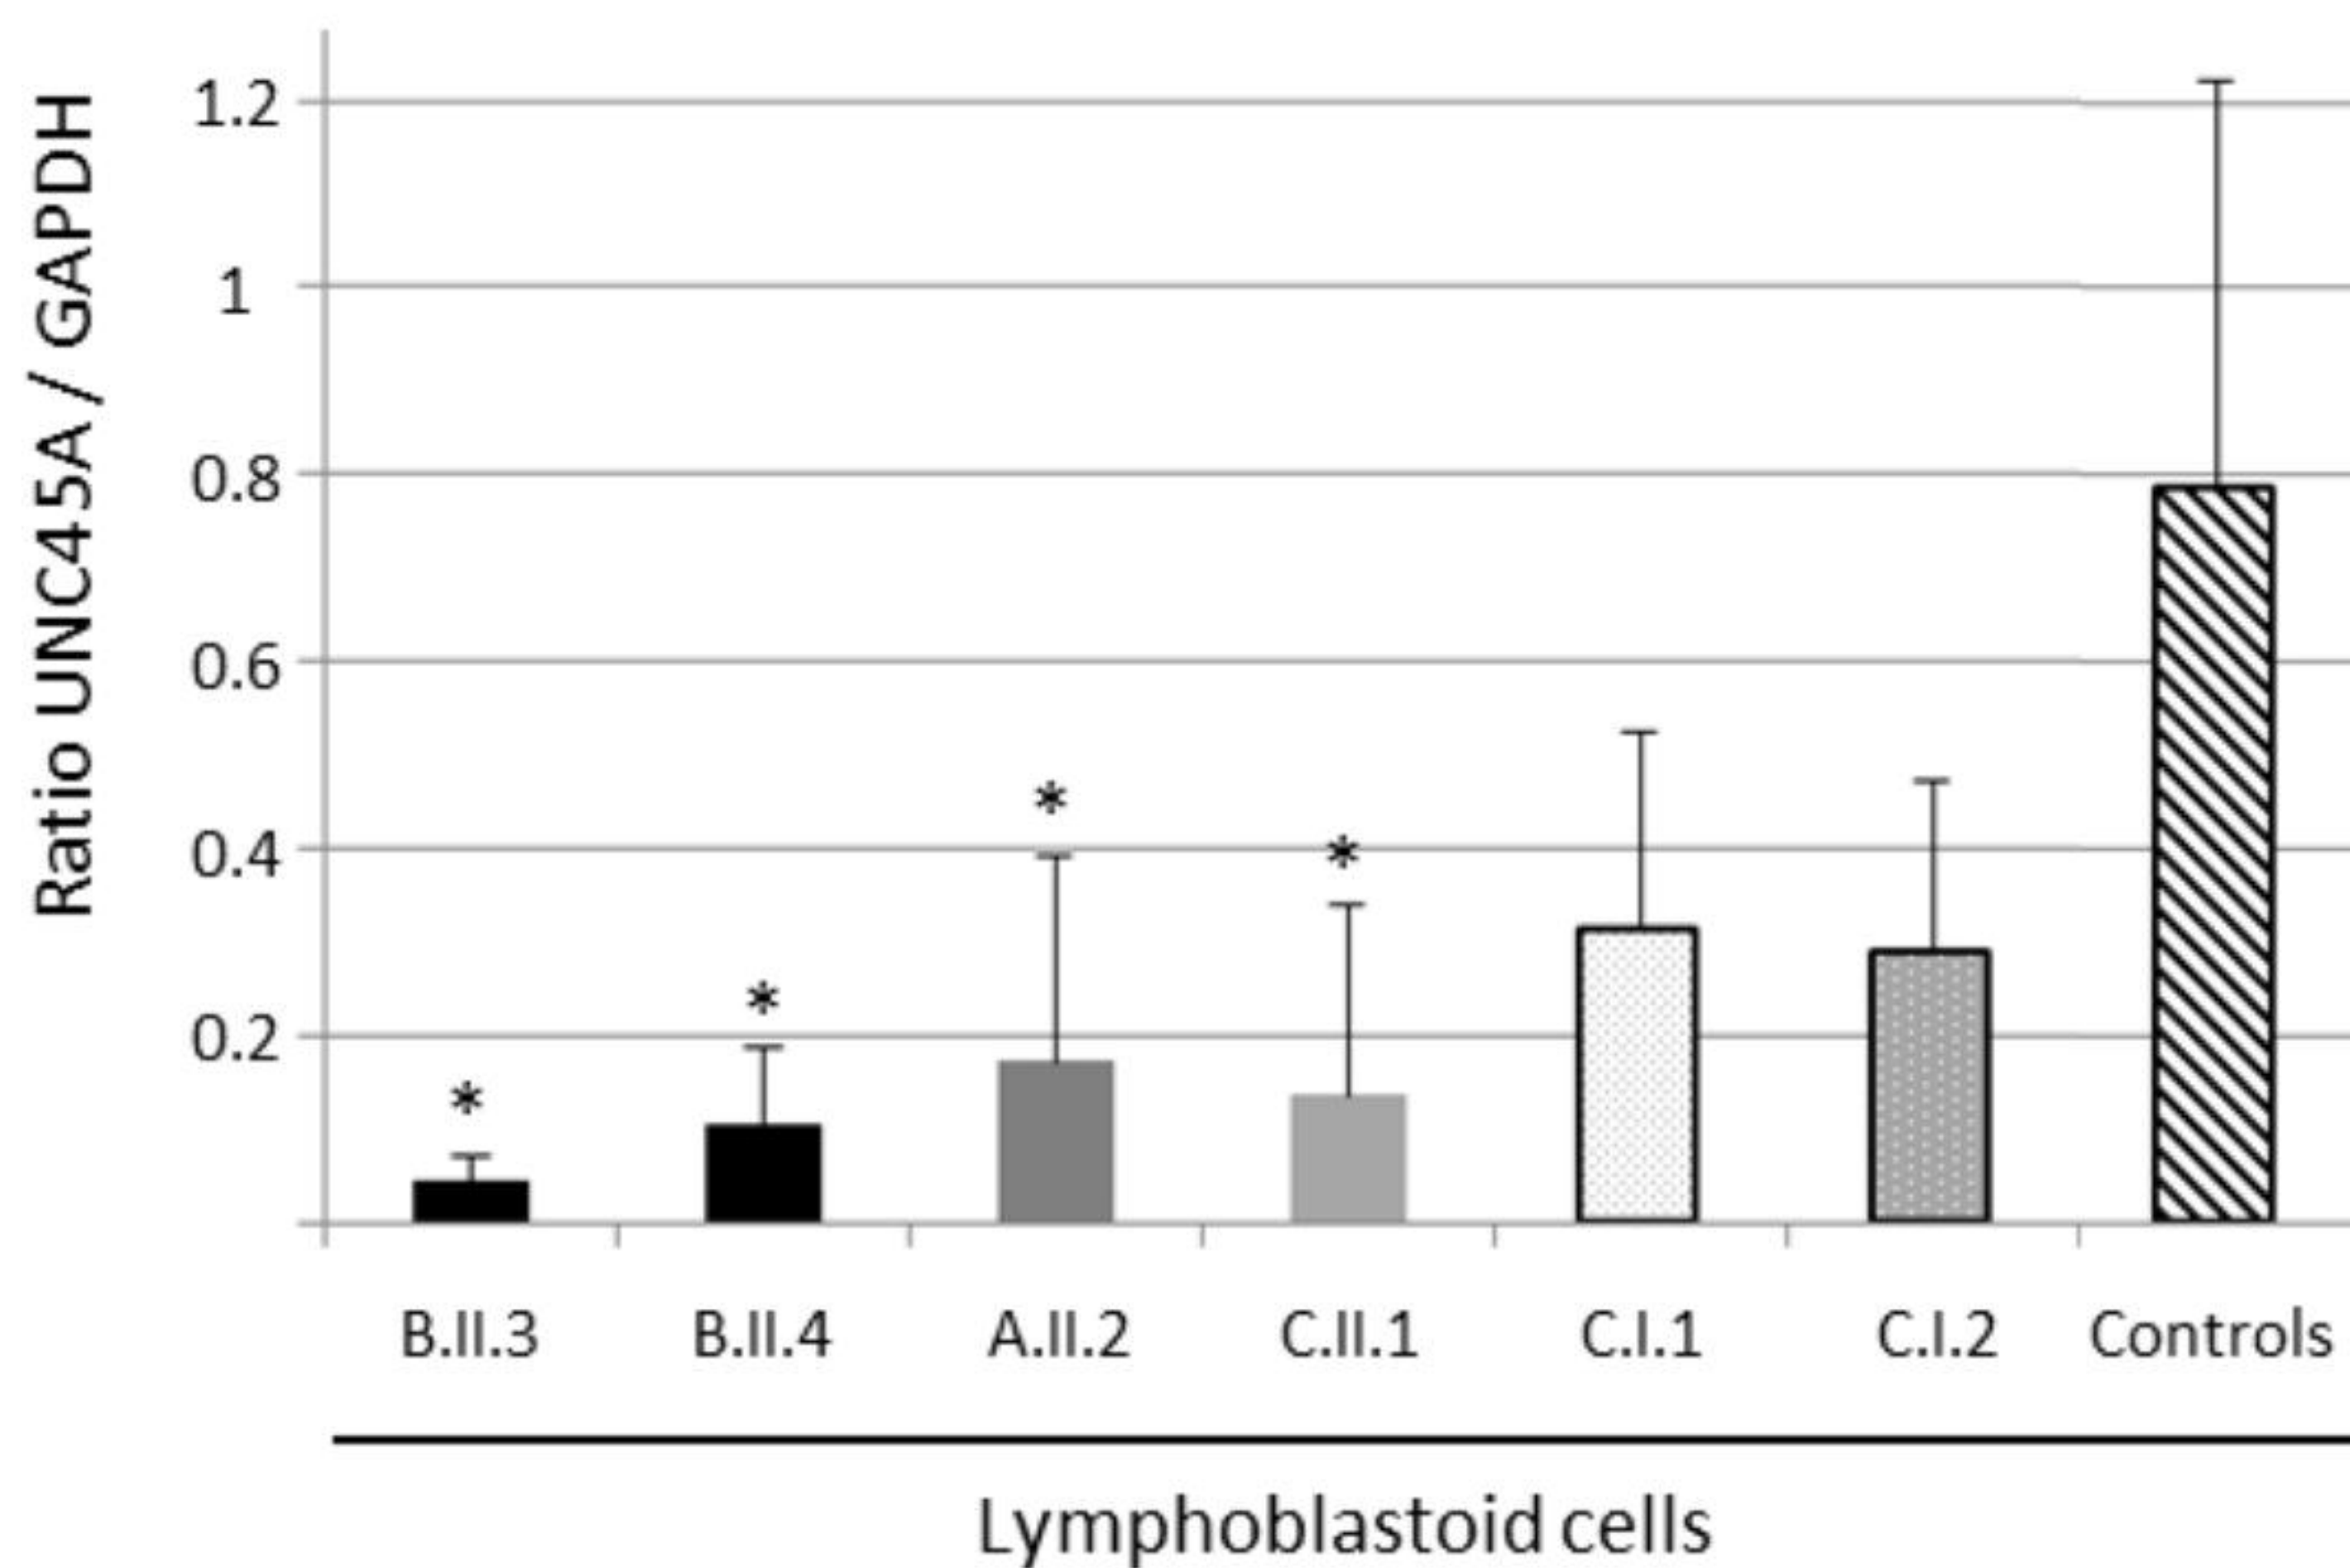**C**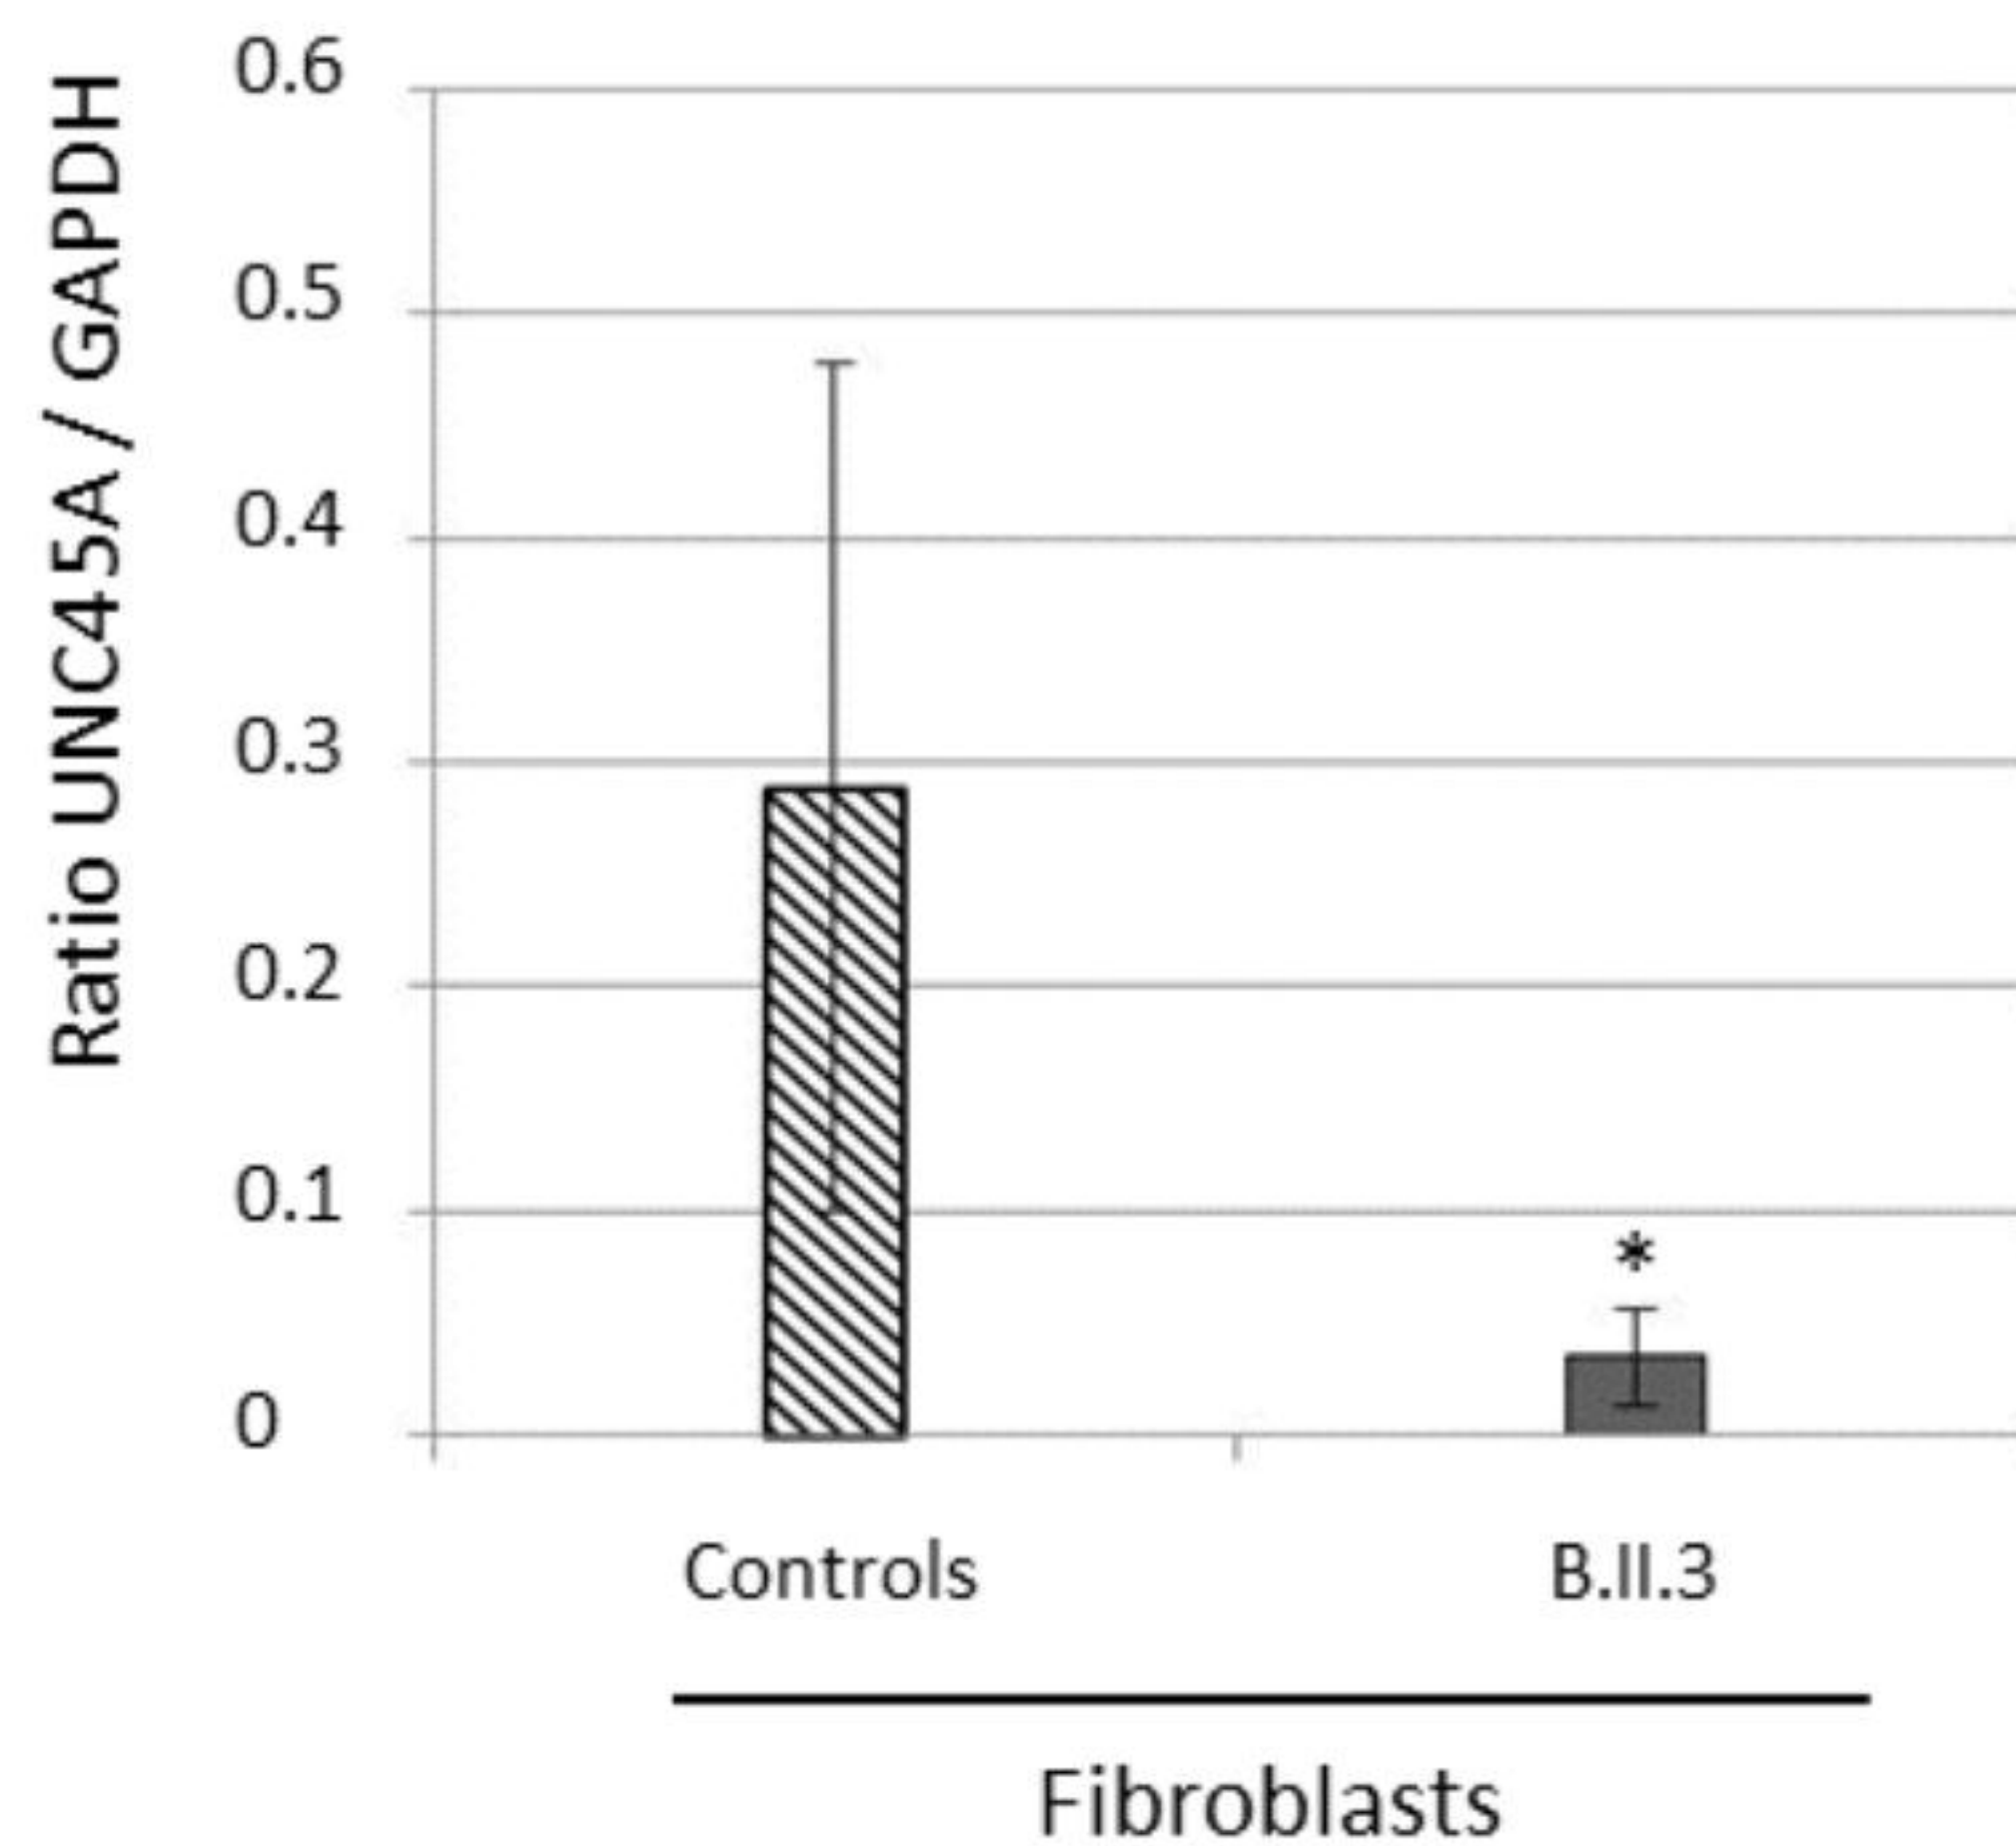

**A.**

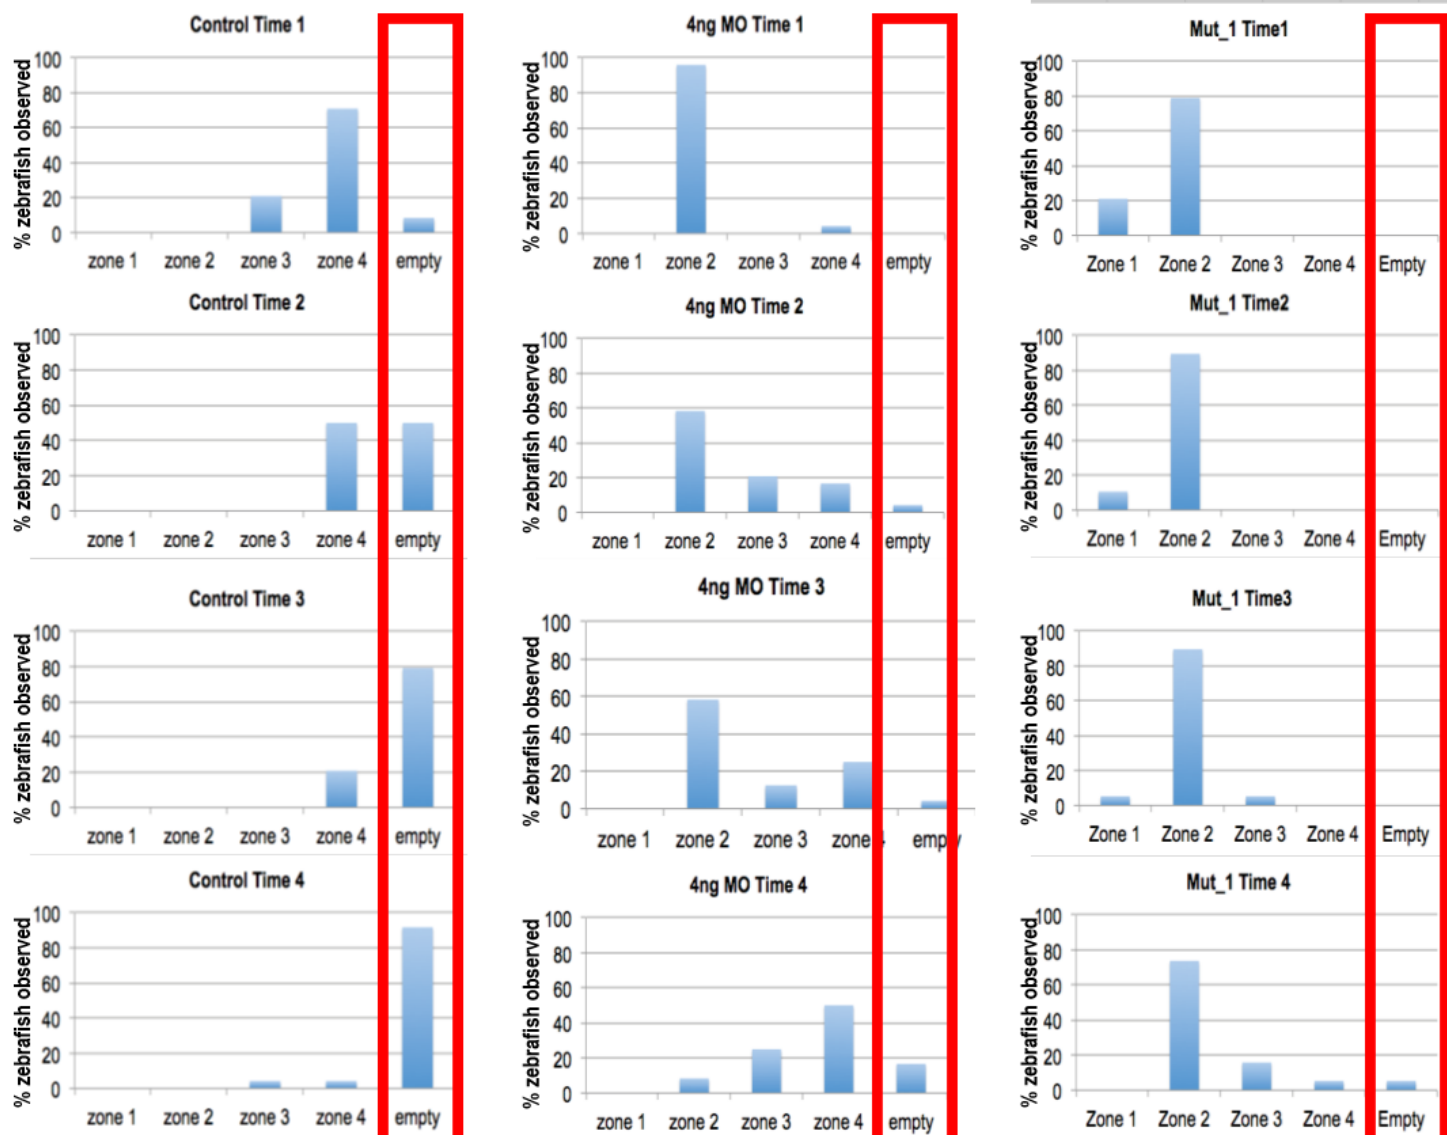

**B.**

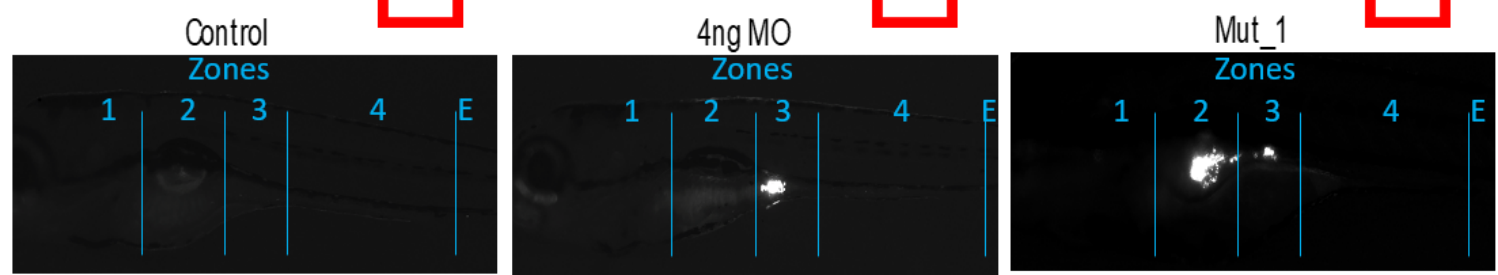



**Dapi****4e8****Phalloidin****Merged****Wild Type**

bioRxiv preprint doi: <https://doi.org/10.1101/208942>; this version posted October 26, 2017. The copyright holder for this preprint (which was not certified by peer review) is the author/funder. All rights reserved. No reuse allowed without permission.

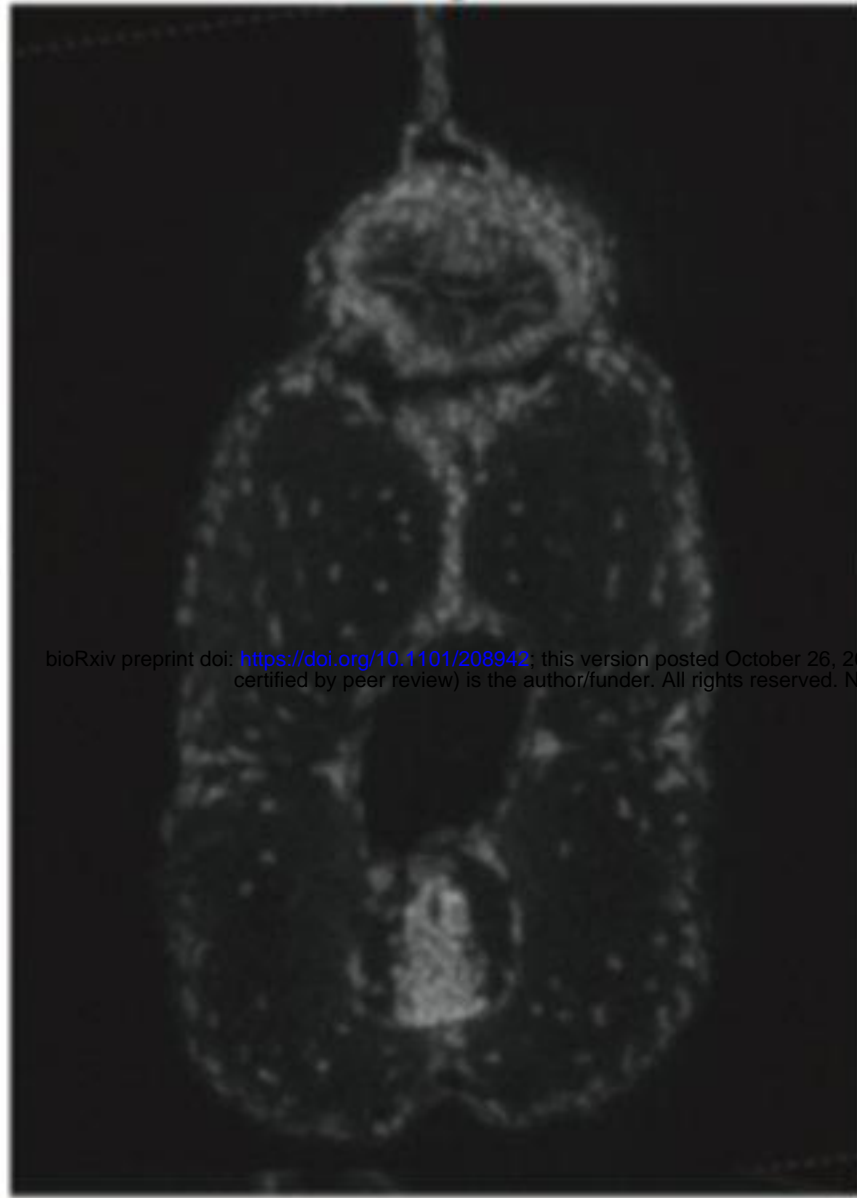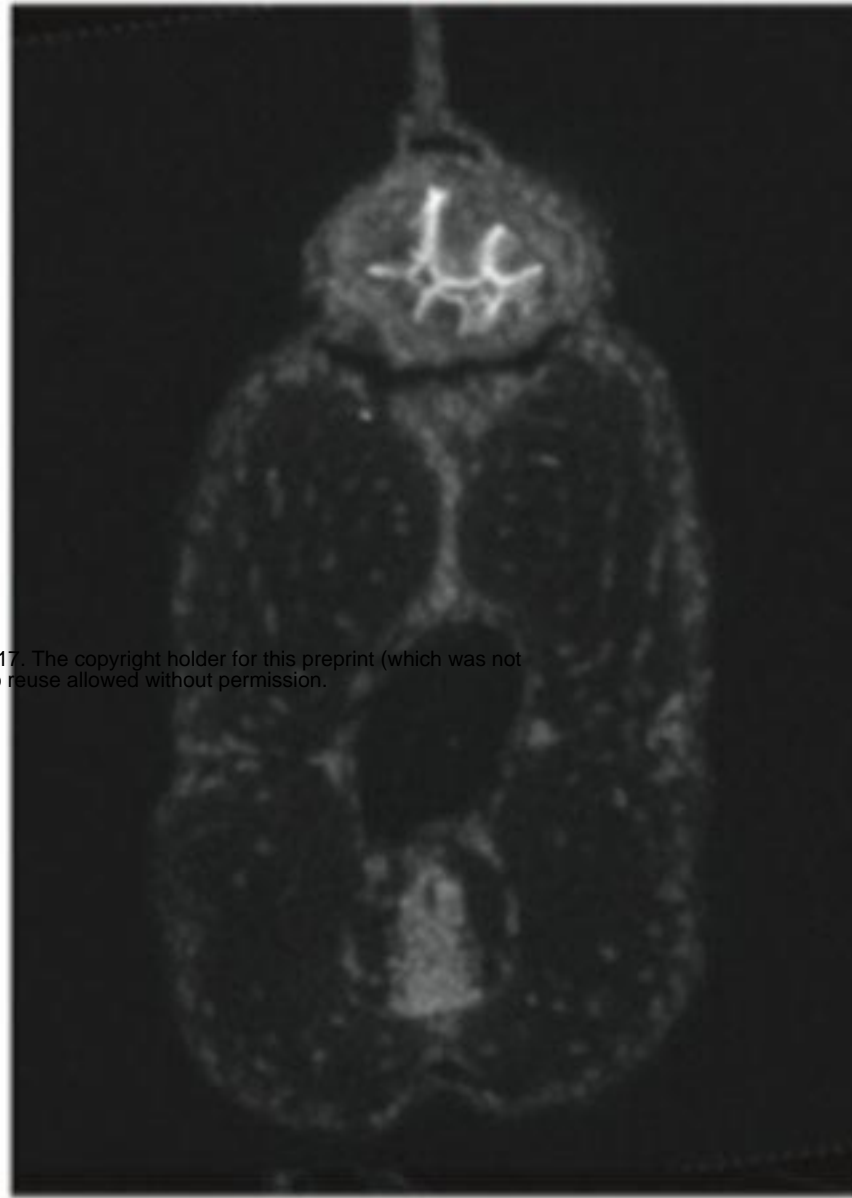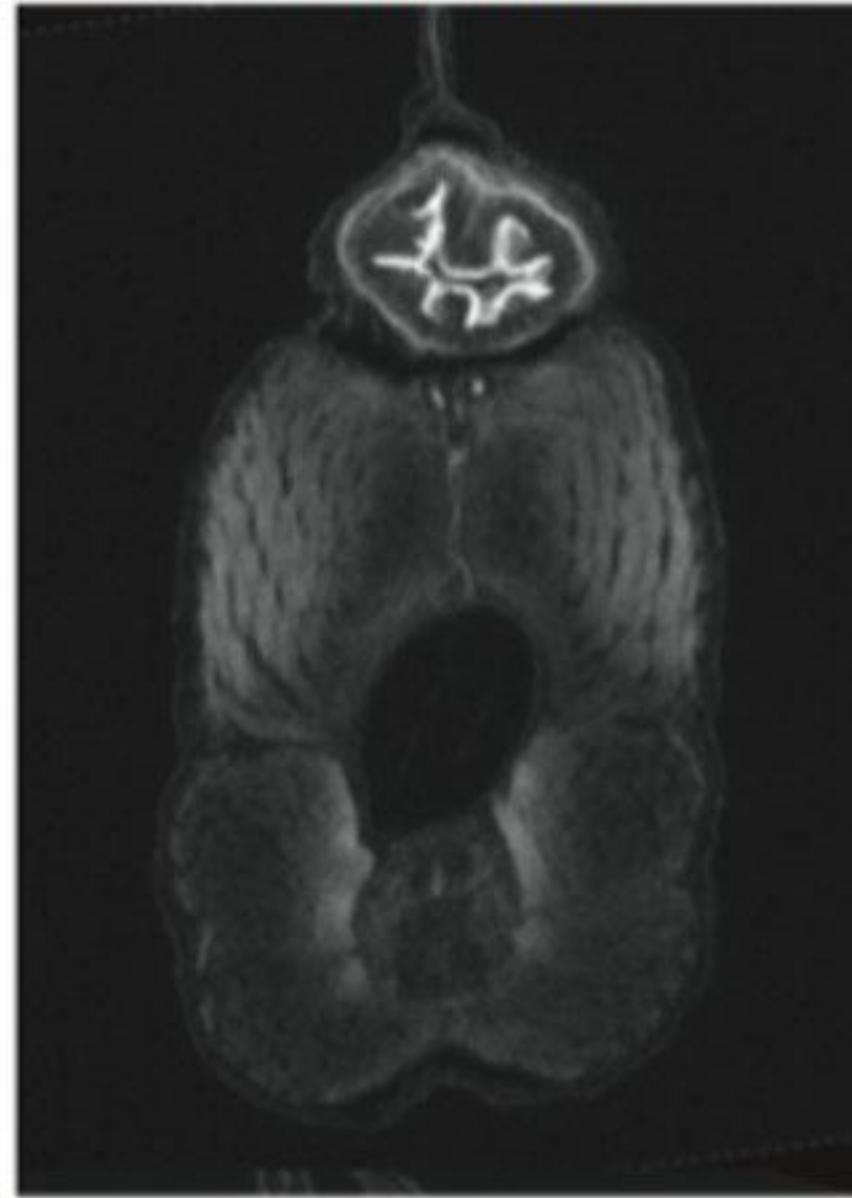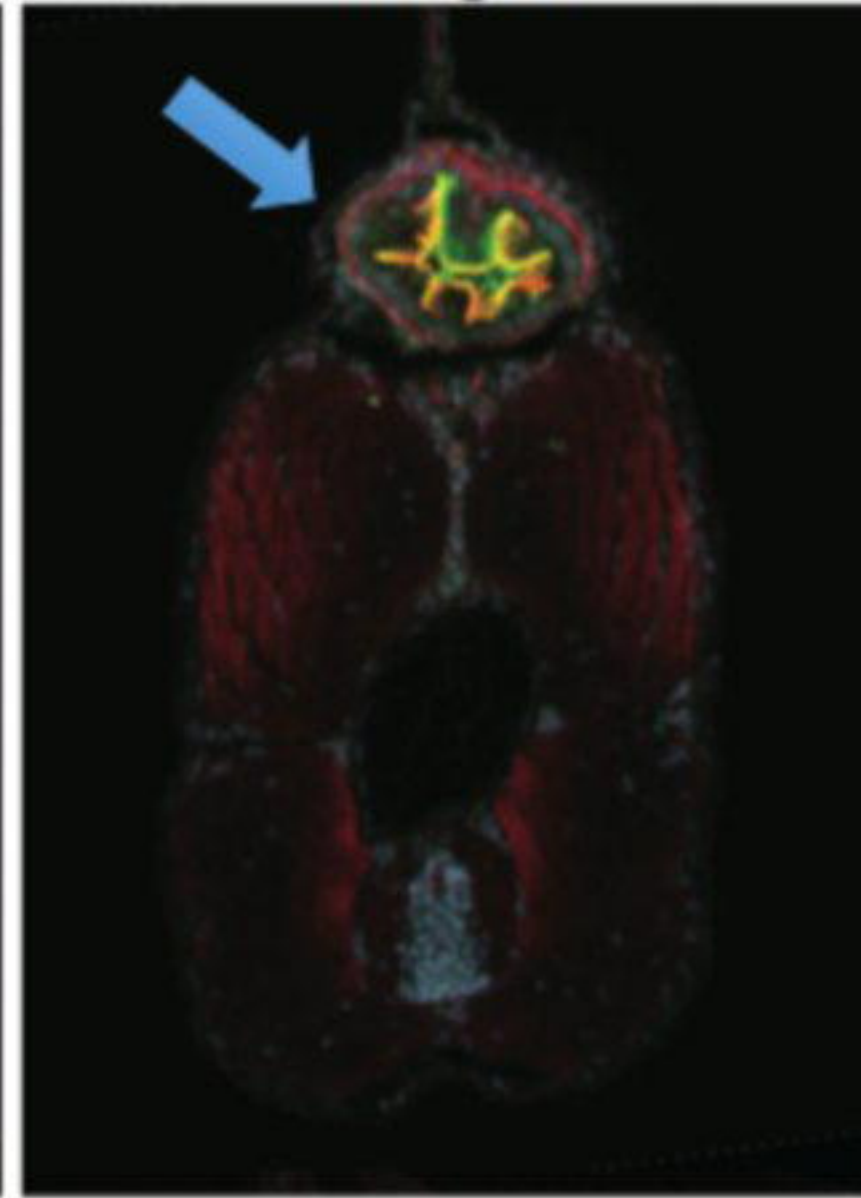**Mutant**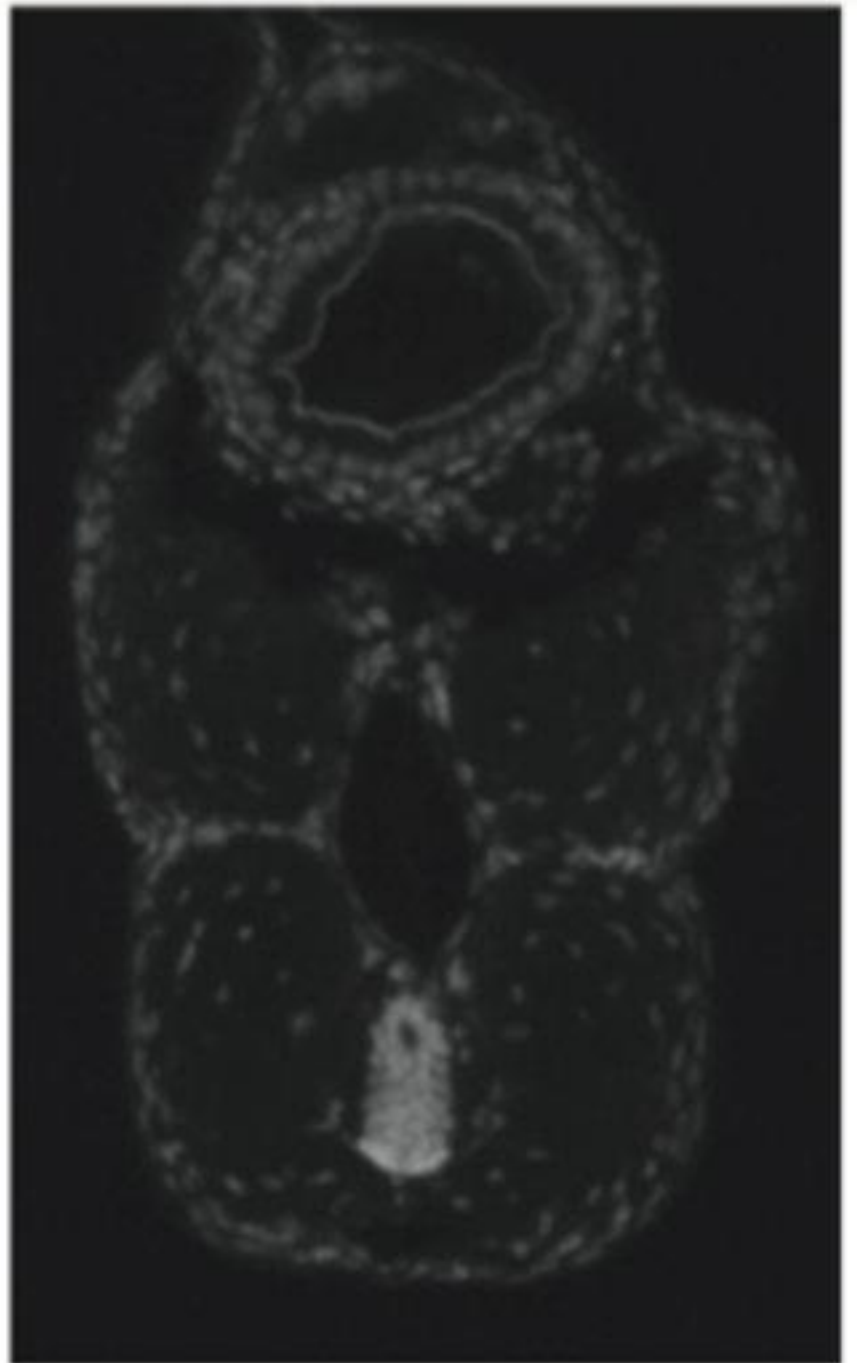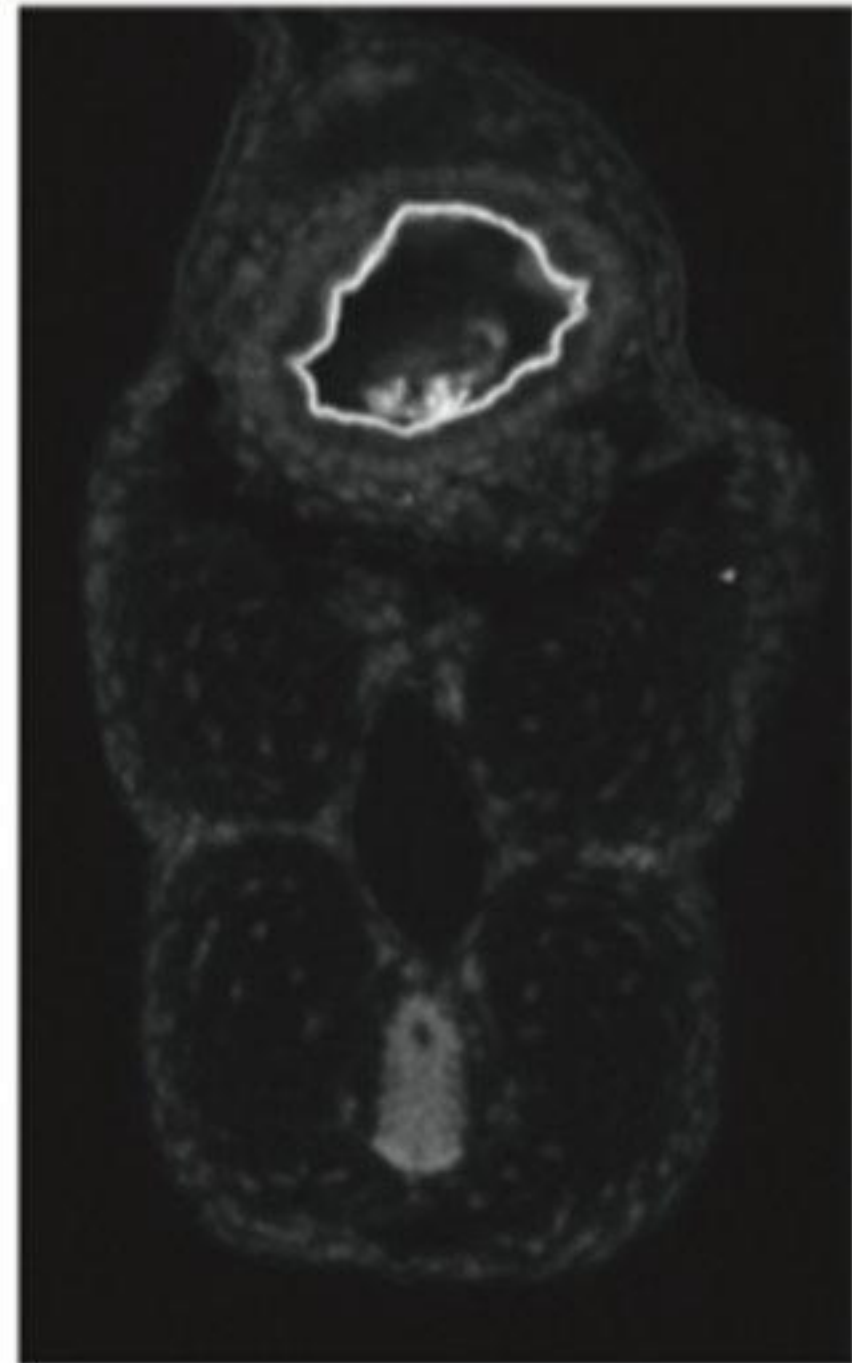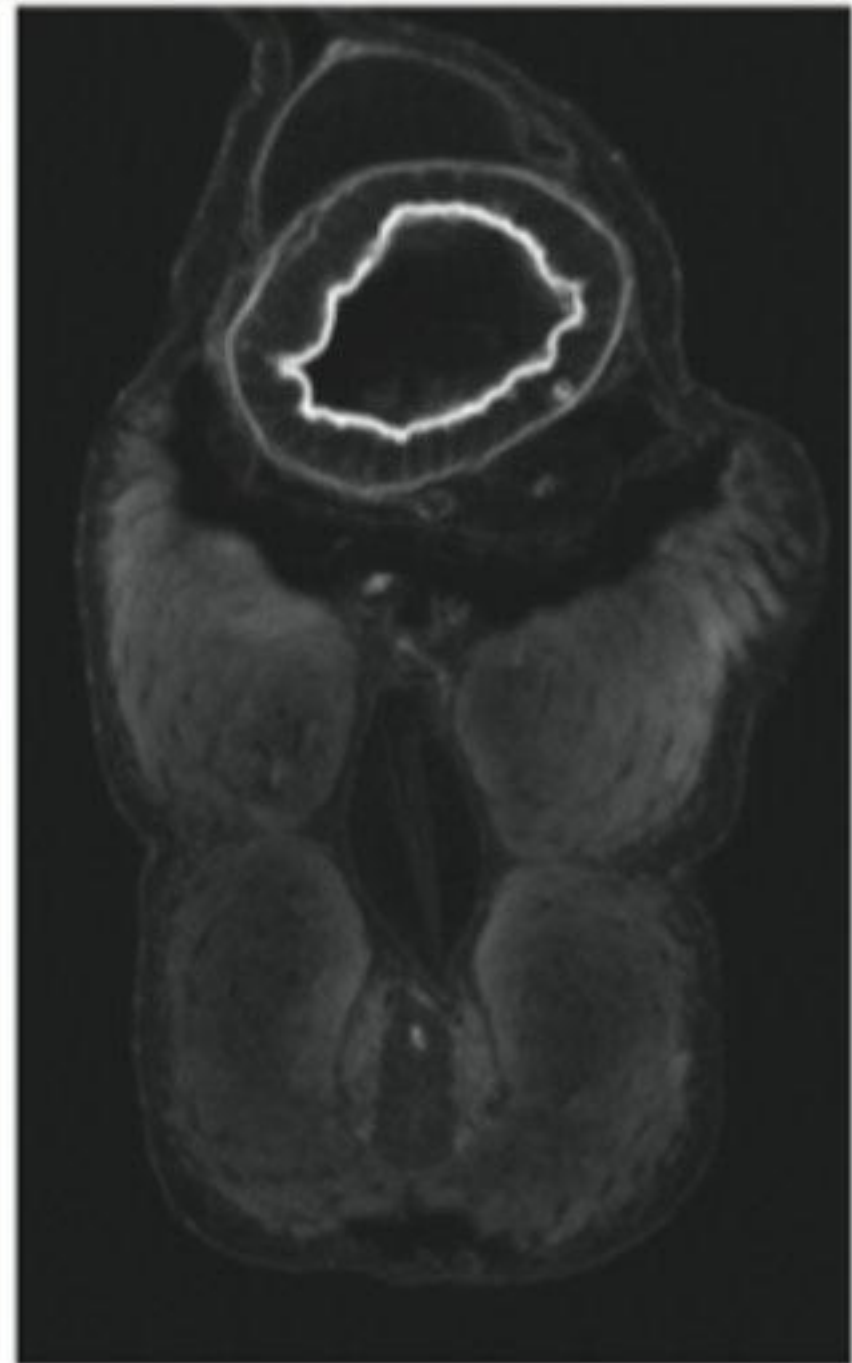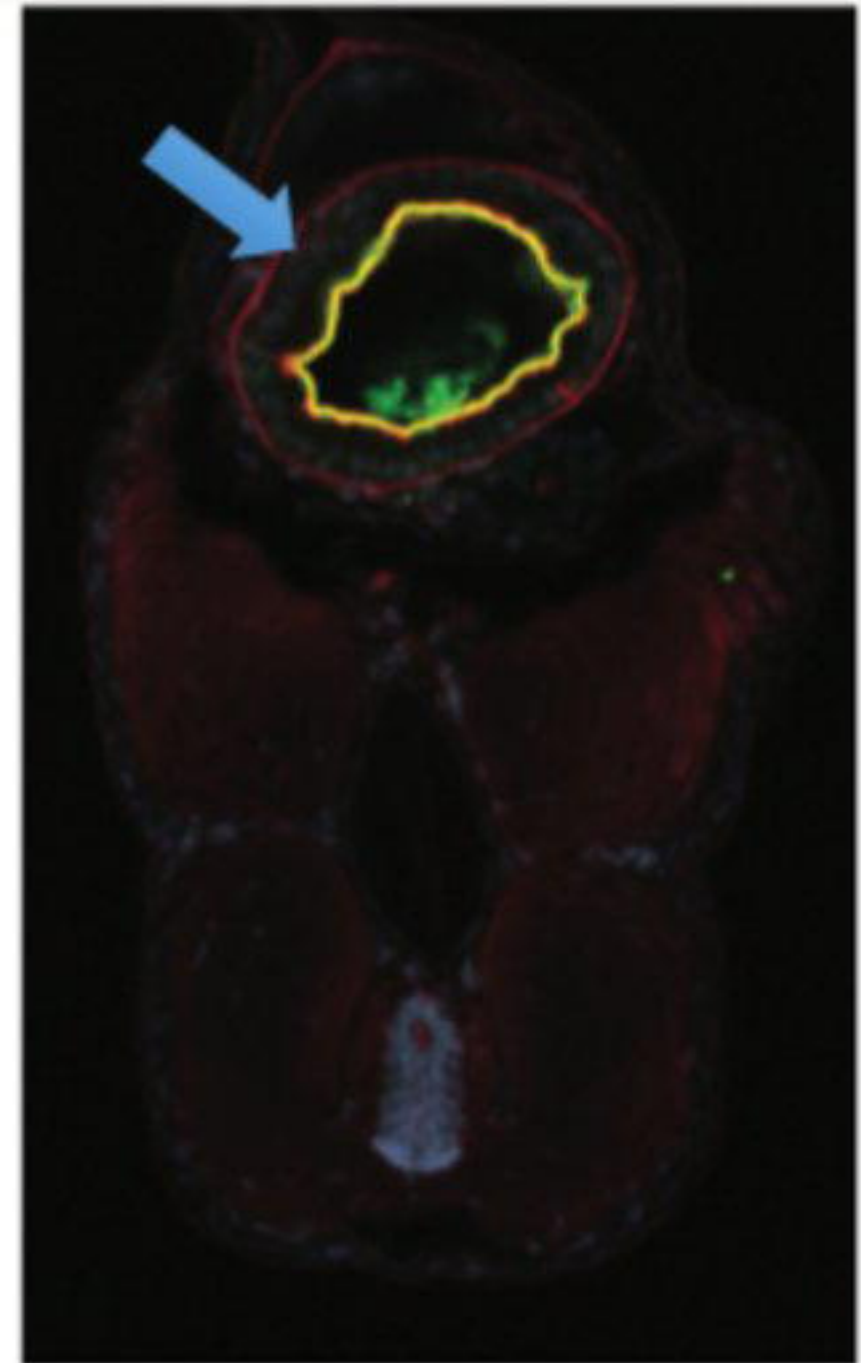

A.

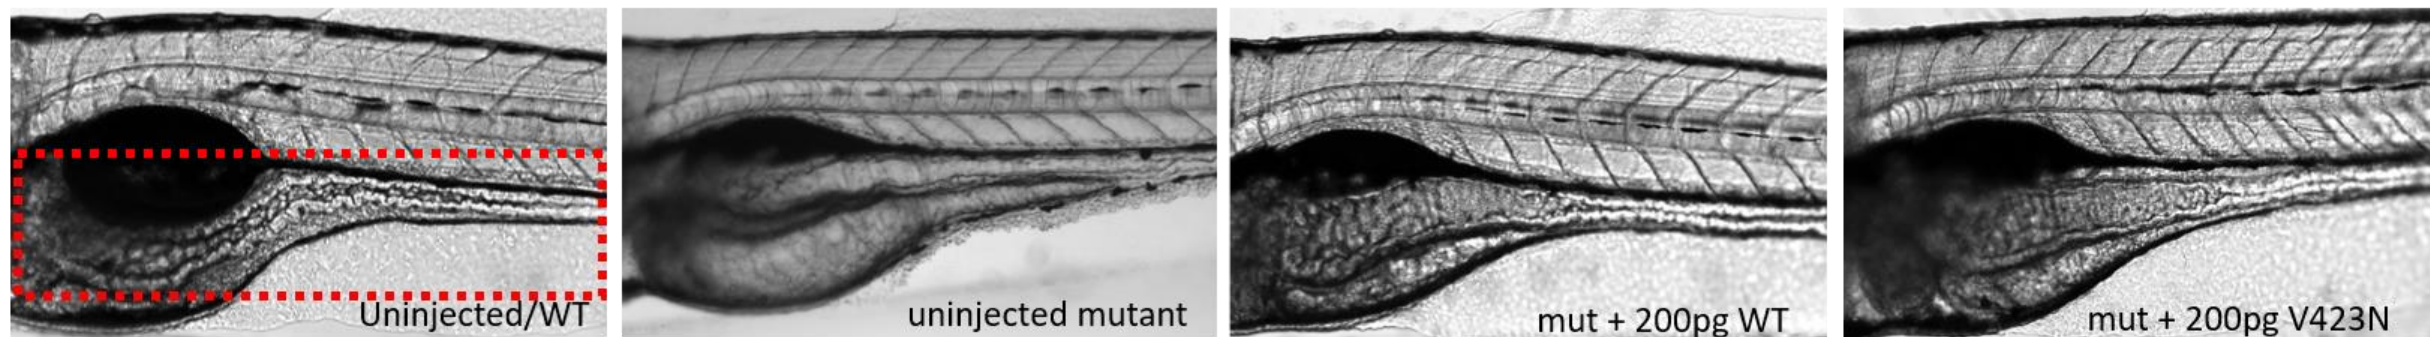

B.

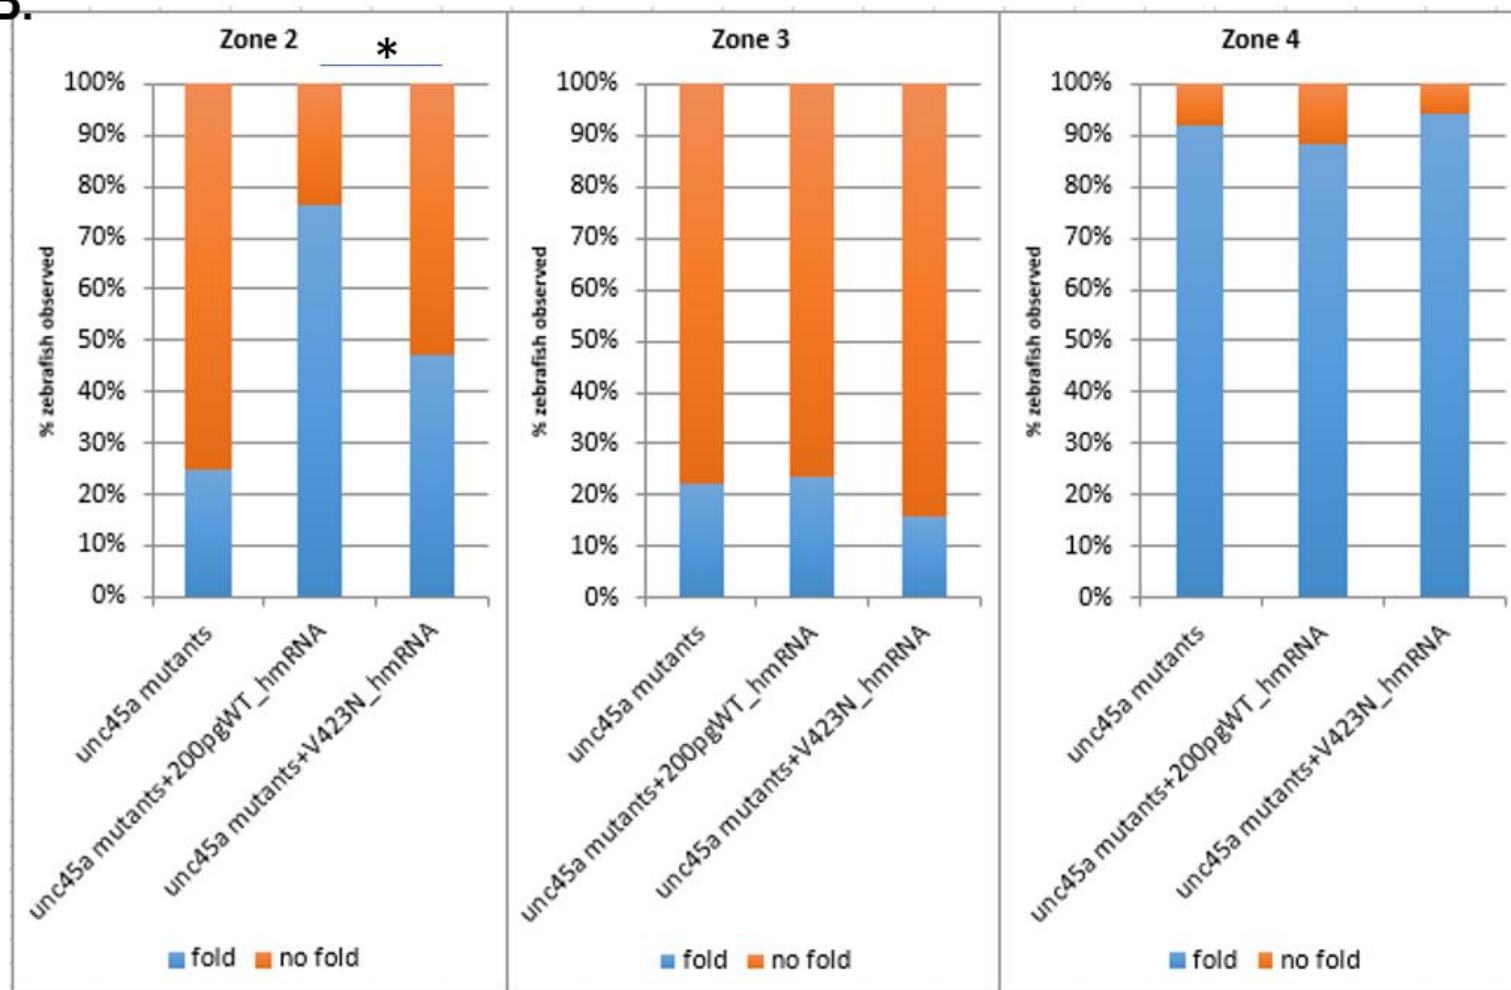

Source: https://www.biorxiv.org/content/biorxiv/early/2017/10/26/208942.full.pdf
